# Supplementary material for: Correction of estimates of retention in care among a cohort of HIV-positive patients in Uganda in the period before starting ART: a sampling-based approach
Source: PubMed Central journal article supplement (PMC5914905; doi:10.1136/bmjopen-2017-017487), 2018-04-20
Supplement: bmjopen-2017-017487.draft_revisions.pdf [file bmjopen-2017-017487.draft_revisions.pdf]

# BMJ Open

BMJ Open is committed to open peer review. As part of this commitment we make the peer review history of every article we publish publicly available.

When an article is published we post the peer reviewers' comments and the authors' responses online. We also post the versions of the paper that were used during peer review. These are the versions that the peer review comments apply to.

The versions of the paper that follow are the versions that were submitted during the peer review process. They are not the versions of record or the final published versions. They should not be cited or distributed as the published version of this manuscript.

BMJ Open is an open access journal and the full, final, typeset and author-corrected version of record of the manuscript is available on our site with no access controls, subscription charges or pay-per-view fees (<http://bmjopen.bmj.com>).

If you have any questions on BMJ Open's open peer review process please email [info.bmjopen@bmj.com](mailto:info.bmjopen@bmj.com)

# BMJ Open

## Correction of estimates of retention in care among a cohort of HIV-positive patients in Uganda in the period before starting ART: a sampling-based approach

|                                 |                                                                                                                                                                                                                                                                                                                                                                                                                                                                                                       |
|---------------------------------|-------------------------------------------------------------------------------------------------------------------------------------------------------------------------------------------------------------------------------------------------------------------------------------------------------------------------------------------------------------------------------------------------------------------------------------------------------------------------------------------------------|
| Journal:                        | <i>BMJ Open</i>                                                                                                                                                                                                                                                                                                                                                                                                                                                                                       |
| Manuscript ID                   | bmjopen-2017-017487                                                                                                                                                                                                                                                                                                                                                                                                                                                                                   |
| Article Type:                   | Research                                                                                                                                                                                                                                                                                                                                                                                                                                                                                              |
| Date Submitted by the Author:   | 25-Apr-2017                                                                                                                                                                                                                                                                                                                                                                                                                                                                                           |
| Complete List of Authors:       | Nyakato, Patience; London School of Hygiene and Tropical Medicine, Infectious Disease Epidemiology; Infectious Disease Institute, Makerere University<br>Kiragga, Agnes; Infectious Disease Institute, Makerere University<br>Kambugu, Andrew; Infectious Disease Institute, Makerere University<br>Bradley, John; London School of Hygiene and Tropical Medicine, Infectious Disease Epidemiology<br>Baisley, Kathy; London School of Hygiene and Tropical Medicine, Infectious Disease Epidemiology |
| <b>Primary Subject Heading</b>: | HIV/AIDS                                                                                                                                                                                                                                                                                                                                                                                                                                                                                              |
| Secondary Subject Heading:      | Epidemiology, HIV/AIDS, Global health, Health services research                                                                                                                                                                                                                                                                                                                                                                                                                                       |
| Keywords:                       | HIV & AIDS < INFECTIOUS DISEASES, Retention, Loss to follow up, CD4, pre-ART, Africa                                                                                                                                                                                                                                                                                                                                                                                                                  |
|                                 |                                                                                                                                                                                                                                                                                                                                                                                                                                                                                                       |

SCHOLARONE™  
Manuscripts

1  
2  
3 **Correction of estimates of retention in care among a cohort of HIV-positive**  
4 **patients in Uganda in the period before starting ART: a sampling-based**  
5 **approach**  
6  
7

8  
9 Patience Nyakato<sup>1,2</sup>, Agnes N Kiragga<sup>2</sup>, Andrew Kambugu<sup>2</sup>, John Bradley<sup>1\*</sup>, Kathy  
10 Baisley<sup>1\*</sup>  
11  
12

13  
14  
15 <sup>1</sup>Department of Infectious Disease Epidemiology, London School of Hygiene and  
16 Tropical Medicine, London, UK; <sup>2</sup>Infectious Diseases Institute, College of Health  
17 Sciences, Makerere University, Kampala, Uganda  
18  
19

20  
21 \*These authors are joint senior authors on this work.  
22  
23

24  
25  
26 **Corresponding author:** Patience Nyakato; Infectious Disease Institute, Mulago  
27 Hospital Complex, College of Health Sciences, Makerere University, PO Box 22418,  
28 Kampala, Uganda. Email: [panyakato2@gmail.com](mailto:panyakato2@gmail.com) Telephone: +256 787437316;  
29 Fax: +256 414 307290  
30  
31  
32

33  
34  
35  
36  
37 Word count: 3617  
38  
39  
40  
41  
42  
43  
44  
45  
46  
47  
48  
49  
50  
51  
52  
53  
54  
55  
56  
57  
58  
59  
60

## ABSTRACT

**Objective:** The aim of this study was to use a sampling-based approach to obtain estimates of retention in HIV care before initiation of antiretroviral treatment (ART), corrected for outcomes in patients who were lost according to clinic registers.

**Design:** Retrospective cohort study of HIV positive individuals not yet eligible for ART (CD4 >500)

**Setting:** 3 urban and 3 rural HIV care clinics in Uganda; information was extracted from the clinic registers for all patients who had registered for pre-ART care between January–August 2015

**Participants:** A random sample of patients who were lost according to the clinic registers (>3 months late to scheduled visit) was traced to ascertain their outcomes.

**Outcome measures:** The proportion of patients lost from care was estimated using a competing risks approach, first based on the information in the clinic records alone and then using inverse probability weights to incorporate the results from tracing. Cox regression was used to determine factors associated with loss from care.

**Results:** Of 1153 patients registered for pre-ART care (68% female, median age 29 years, median CD4 count 645 cells/uL), 307 (27%) were lost according to clinic records. Among these, 195 (63%) were selected for tracing; outcomes were ascertained in 118 (61%). Seven patients (6%) had died, 40 (34%) were in care elsewhere, and 71 (60%) were out of care. Loss from care at 9 months was 30.2% (95% confidence interval (CI)=27.3%–33.5%). After incorporating outcomes from tracing, loss from care decreased to 18.5% (95%CI 13.8%–23.6%).

**Conclusion:** Estimates of loss from HIV care may be too high if based on routine clinic data alone. A sampling based approach is a feasible way of obtaining more accurate estimates of retention, accounting for transfers to other clinics.

**Key words:** HIV, retention in care, loss to follow up, pre-ART, CD4, Africa

## Article Summary

### Strengths and limitations of this study

- Most studies that use tracing to estimate retention in care focus on HIV-positive individuals on ART; this is one of few studies to apply these methods in the period before ART initiation.
- A sampling based approach is feasible and provides an opportunity to obtain more accurate estimates of retention in HIV care programmes in resource-limited settings
- Outcomes were not ascertained in all patients who were traced, so individuals who were traced successfully may not be representative of all who were lost.
- The follow-up time was relatively short, so some patients who were considered lost according to the clinic registers may have returned to the clinic at a later date.

## INTRODUCTION

Access to antiretroviral therapy (ART) has expanded considerably in sub-Saharan Africa (SSA), with 12 million people in the region receiving ART in 2016.[1] With the UNAIDS 90-90-90 targets (90% of HIV positive individuals know their status, 90% of those diagnosed are on ART and 90% of those on ART are virally suppressed by 2020), more HIV positive individuals are expected to be on ART and attain viral suppression.[2-4] However, although treatment coverage in SSA doubled between 2010 and 2015, estimated coverage was still only 47% in 2015, and HIV-related mortality remains high, partly due to loss from care.[1,2]

Major gaps in HIV treatment programmes include linking individuals who test HIV positive to care, and prompt initiation of ART. Previous WHO treatment guidelines were based on CD4 count thresholds, with pre-ART care focused on immunological monitoring until individuals became eligible for ART. A 2012 systematic review of retention in HIV care in SSA found a median of 57% of individuals returned for CD4 count results after testing HIV-positive, and among those who received their results, 45% remained in care until they became eligible for ART.[5] Even among those who were ART eligible, only a median of 66% initiated ART.

The WHO released new HIV treatment guidelines in 2015, recommending that ART be offered to all HIV positive individuals irrespective of CD4 count.[6] If widely implemented, the 'treat all' approach would contribute significantly to achieving the 90-90-90 goals. As of end 2016, many countries in SSA had begun implementing the new guidelines. However, several countries had introduced the guidelines only in selected treatment sites, and others had not yet adopted the new policy.[1] Scale-up of ART treatment for all HIV positive people in resource-limited settings will require broad health systems strengthening, which in practice may mean that, for budgetary or other practical reasons, some clinics may still use CD4 counts to prioritise starting treatment. Under the 'treat all' guidelines, many individuals who are entering HIV care will have high CD4 counts and be asymptomatic, and therefore face different barriers to starting ART. Losses between testing HIV positive and ART initiation are still likely to remain. Obtaining accurate estimates of loss from care and

1  
2  
3 outcomes in this stage will be important for evaluating the impact of the 'treat all'  
4 guidelines, and for designing interventions to improve retention and increase the  
5 numbers starting ART.[7]  
6  
7

8  
9 Standard estimates of retention consider those who are lost to represent  
10 disengagement from care. However, many of those lost may include transfers to  
11 other care centres.[8,9] In rural Uganda, estimates of patient retention 3 years after  
12 initiating ART increased from 60% to 85% when corrected for outcomes among  
13 those who were lost.[8,10] Therefore, estimates of retention that consider patients  
14 who are lost from care to have disengaged from care are biased, and may result in  
15 misdirection of resources at the clinic and national levels.  
16  
17  
18  
19  
20  
21

22 We used a sampling-based approach to obtain more accurate estimates of loss from  
23 pre-ART care among HIV positive individuals attending clinics in Uganda who were  
24 not yet eligible for ART. This approach involves tracing a sample of lost patients and  
25 using a weighted analysis to correct the estimates of retention in the entire clinic  
26 population, with the assumption that the traced patients are representative of all who  
27 were lost.[11-13] We also explore the effect of this approach on estimates of  
28 mortality, and factors associated with loss from care before ART initiation.  
29  
30  
31  
32  
33  
34  
35

## 36 **METHODS**

### 37 **Study setting**

38  
39 This was a retrospective cohort study of patients who had registered in pre-ART HIV  
40 care at 6 government clinics in Uganda: 3 urban Kampala city municipal clinics and 3  
41 rural health centres in Hoima and Kibaale in Western Uganda. These clinics are  
42 supported by the Infectious Diseases Institute, Makerere University and offer  
43 integrated HIV testing and care facilities, provision of ART, and laboratory support.  
44 Most persons attend the HIV counselling and testing facilities as walk-ins.  
45 Individuals who test positive are referred for care within the clinic, or a preferred  
46 alternate facility, for immediate CD4 testing. Individuals are registered at the clinic at  
47 the time of initiating CD4 testing. They are then asked to return to the clinic within  
48 two weeks for their CD4 results. At the time of the study, individuals who were not  
49  
50  
51  
52  
53  
54  
55  
56  
57  
58  
59  
60

1  
2  
3 yet eligible for ART (CD4 count >500 cells/uL) were enrolled in a general pre-ART  
4 HIV care programme, and visited the clinic every 3 months for routine clinic check-  
5 ups and cotrimoxazole prophylaxis.  
6  
7

## 8 9 **Study design**

10  
11 A list of all individuals who tested HIV positive between January-May 2015 (Kampala  
12 clinics) and January-August 2015 (rural clinics) and had a CD4 >500 cells/uL was  
13 obtained from the routine clinic records. Socio-demographic and routine clinical data  
14 for patients attending the Kampala clinics was extracted using the electronic patient  
15 records system (OpenMRS). For patients attending the rural clinics, the information  
16 was manually extracted from the paper-based clinic records, and entered into an  
17 Access database. Patients were then classified as either i) still in care; ii)  
18 transferred out to another clinic; iii) died; or iv) lost to follow-up, based on the  
19 information available from the clinic records. Patients were counted as lost to follow-  
20 up if they were 3 or more months late for their last scheduled visit at the clinic, and  
21 not known to have transferred out or to have died.  
22  
23  
24  
25  
26  
27  
28  
29  
30

31 From the sampling frame of all patients who were classified as lost, a random  
32 sample was selected, separately for urban clinics and rural clinics, for intensive  
33 tracing. The size of the sample was based on practical considerations of how many  
34 patients could be traced at each clinic, rather than on formal sample size  
35 calculations.  
36  
37  
38  
39  
40

41 Tracing was done between November 2015–March 2016 for both the urban and rural  
42 clinics. Tracers attempted to contact patients through phone calls and home visits,  
43 using addresses and locator forms containing secondary phone numbers, areas of  
44 residence, and a map to the area of residence. Patients who were successfully  
45 traced were asked to provide information about their current HIV care status:  
46 whether they were registered elsewhere and were attending another clinic; whether  
47 they had started ART elsewhere; and reasons for withdrawing from HIV care if not  
48 attending any HIV care facility. Patient deaths were ascertained through an  
49 interview with a close informant.  
50  
51  
52  
53  
54  
55  
56  
57  
58  
59  
60



1  
2  
3 Individuals were considered to have disengaged from care if they had not registered  
4 at any other clinic and had not returned to the clinic where they were originally  
5 registered for more than 3 months after their last scheduled visit. Individuals who  
6 said they were purchasing cotrimoxazole directly from the pharmacy (i.e. not under  
7 clinician's care) or they obtained drugs through relatives/friends were also  
8 considered to have disengaged from care. Individuals who reported to have  
9 registered at another clinic were considered to be in care.  
10  
11  
12  
13  
14

### 15 **Statistical analysis**

16  
17  
18 Descriptive statistics (proportions, means, medians and interquartile ranges) were  
19 used to summarise baseline characteristics. Characteristics of patients who were  
20 retained in pre-ART care and those who were lost were tabulated and compared  
21 using Chi square tests, with the Rao-Scott correction to account for correlation within  
22 clinics. In addition, characteristics of patients who were selected for tracing and  
23 traced successfully were compared with those who were selected but could not be  
24 found.  
25  
26  
27  
28  
29  
30

31 First, using only the information available from the clinic records, the proportion of  
32 patients who were lost from pre-ART care was estimated using a cumulative  
33 incidence approach, where deaths known to the clinics were treated as a competing  
34 risk. Observation time began on the date of registration at the clinic (i.e. the date of  
35 presenting for CD4 testing after HIV diagnosis) and ended at the date of known  
36 transfer out, death, loss from care (defined as 3 months after last missed  
37 appointment) or review of the clinic records (for individuals who were still in care).  
38 Patients who initiated ART were censored on the date of ART initiation. Then, a  
39 corrected analysis was conducted using the same approach but incorporating the  
40 outcomes obtained from tracing. Patients who were successfully traced were  
41 weighted using inverse probability weights, calculated as the inverse proportion of  
42 patients who were successfully traced among all patients who were lost. Patients  
43 who could not be found, or who were not selected for tracing, were given a weight of  
44 0. Patients who were still in care according to the clinic registers were given a weight  
45 of 1. Weights were calculated separately for each clinic. For individuals who were  
46 traced and found to still be in care, observation time was considered to end at the  
47  
48  
49  
50  
51  
52  
53  
54  
55  
56  
57  
58  
59  
60

1  
2  
3 date of interview. Individuals who were traced and found to be alive but not in care  
4 were considered to have been lost 3 months after their last missed appointment at  
5 the original clinic.  
6  
7

8  
9 A sensitivity analysis was also done: first we assumed that all individuals who were  
10 traced and not found were alive and in care elsewhere; second, we assumed that all  
11 patients who were not found were alive but not in care. Confidence intervals for the  
12 weighted estimates were obtained through bootstrapping using percentiles of the  
13 bootstrap distribution with 2000 replications.  
14  
15  
16

17  
18 Cox proportional hazards models were fitted to examine factors associated with loss  
19 from care, using data from the clinic registers alone and in a weighted analysis after  
20 incorporating results from tracing. Robust standard errors were used to account for  
21 correlation within clinics. Owing to the small number of covariates available, all  
22 variables were included in the final multivariate model. In the rural clinics, data on  
23 clinical covariates were often missing from the patient records; therefore, the  
24 analysis of clinical covariates was restricted to patients from the urban clinics. The  
25 appropriate functional forms of continuous covariates were explored using low order  
26 polynomials. All analyses were done using STATA version 14.2 (Stata Corp, College  
27 Station, Texas).  
28  
29  
30  
31  
32  
33  
34  
35

### 36 37 **Ethics**

38  
39 Ethical approvals were obtained from the London School of Hygiene and Tropical  
40 Medicine Ethics Committee (Ref 10334), Makerere University School of Public  
41 Health Higher Degrees Research and Ethics Committee (Ref 353), Infectious  
42 Diseases Scientific Review Committee and the Uganda National Council for Science  
43 and Technology (Ref 3998). Participants who were traced successfully gave written  
44 or oral (phone interviews) informed consent.  
45  
46  
47  
48  
49

### 50 51 **RESULTS**

52  
53  
54 Between the period of January to August 2015, 1153 individuals had registered in  
55 pre-ART care at the 6 clinics: 925 (80.2%) at the urban clinics and 228 (19.8%) at  
56  
57  
58  
59

1  
2  
3 the rural clinics. 307 (26.6%) individuals were classified as lost from care (Table 1);  
4 207 from the urban clinics (22.4% of urban patients) and 100 from the rural clinics  
5 (43.9% of rural patients). A random sample of 195 (63.5% of those lost) patients was  
6 selected for tracing (116 from the urban clinics and 79 from the rural clinics) and 118  
7 (60.5%) were successfully traced. 70 patients had face-to-face interviews in the  
8 clinics, 20 had telephone interviews, and 28 had home visits.

9  
10  
11  
12  
13  
14 The mean (SD) age of all patients who registered in pre-ART care was 30.6 years  
15 (9.0); the majority (68.2%) were females, and the median (IQR) CD4 count was 645  
16 (529–834) cells/uL. Characteristics of patients who were still in care were generally  
17 similar to those who were lost but there was some evidence that those who were lost  
18 were most likely to be from rural clinics and to have higher CD4 counts (Table 1).  
19 Among the 195 patients who were selected for tracing, there was no evidence of a  
20 difference in the characteristics between those who were successfully traced and  
21 those who were not found. Of those who were successfully traced, 40 (33.9%) were  
22 found to be actively in care in other clinics and 71 (60.2%) were out of care. 7 (5.9%)  
23 individuals were found to have died after having left care.

24  
25  
26  
27  
28  
29  
30  
31  
32 At 9 months, the cumulative incidence of loss from care based on the clinic registers  
33 was 30.2% (95% confidence interval (CI)=27.3%–33.5%; Figure 1). After  
34 incorporating outcomes from those who were successfully traced, loss from care  
35 reduced to 18.5% (95%CI 13.8%–23.6%). From the sensitivity analysis, assuming  
36 that the individuals who were traced but not found were all in care then loss was  
37 14.9% (95%CI=10.8%–19.6%). Assuming that these patients were all out of care,  
38 then loss from care increased to 38.5% (95%CI= 31.5%–45.7%). Loss from care  
39 was higher in rural than urban clinics (46.1% vs 25.8%, respectively, based on the  
40 clinic registers). When corrected for the outcomes of those who were traced, loss  
41 from care was 28.8% (95%CI=19.9%–37.5%) in the rural clinics and 15.3%  
42 (95%CI=9.9%–21.5%) in the urban clinics.

43  
44  
45  
46  
47  
48  
49  
50  
51 Based on the information available from the clinic registers alone, no patients were  
52 known to have died. After tracing, 7 patients were found to have died. After  
53 incorporating the deaths that were found through tracing, the cumulative incidence of  
54 mortality at 9 months was estimated to be 1.6% (CI=0.5%–3.0%).  
55  
56  
57  
58  
59  
60

**Table 1. Characteristics of patients registered for pre-ART care**

| Characteristics | In care<br>(N=864)<br>N (col %) | Lost<br>(N=307)<br>N (col %) | p-value <sup>a</sup> | Tracked<br>(N=195)<br>N (col %) | Not tracked<br>(N=112)<br>N (col %) | p-value <sup>b</sup> | Found<br>(N=118)<br>N (col %) | Not found<br>(N=77)<br>N (col %) | p-value <sup>c</sup> |
|-----------------|---------------------------------|------------------------------|----------------------|---------------------------------|-------------------------------------|----------------------|-------------------------------|----------------------------------|----------------------|
| Sex             |                                 |                              | 0.17                 |                                 |                                     | 0.97                 |                               |                                  | 0.84                 |
| Male            | 258 (30.5%)                     | 109 (35.5%)                  |                      | 69 (35.4%)                      | 72 (64.3%)                          |                      | 41 (34.7%)                    | 28 (36.4%)                       |                      |
| Female          | 588 (69.5%)                     | 198 (64.5%)                  |                      | 126 (64.6%)                     | 40 (35.7%)                          |                      | 77 (65.3%)                    | 49 (63.6%)                       |                      |
| Location        |                                 |                              | 0.02                 |                                 |                                     | 0.13                 |                               |                                  | 0.38                 |
| Urban sites     | 718 (84.9%)                     | 207 (67.4%)                  |                      | 116 (59.5%)                     | 91 (81.3%)                          |                      | 66 (55.9%)                    | 50 (64.9%)                       |                      |
| Rural sites     | 128 (15.1%)                     | 100 (32.6%)                  |                      | 79 (40.5%)                      | 21 (18.8%)                          |                      | 52 (44.1%)                    | 27 (35.1%)                       |                      |
| Age in years    |                                 |                              | 0.15                 |                                 |                                     | 0.25                 |                               |                                  | 0.44                 |
| <20             | 27 (3.2 %)                      | 18 (5.9 %)                   |                      | 14 (7.3 %)                      | 4 (3.6%)                            |                      | 10 (8.7 %)                    | 4 (5.3 %)                        |                      |
| 20-29           | 415 (49.2%)                     | 158 (52.1%)                  |                      | 96 (50.3%)                      | 62 (55.4%)                          |                      | 53 (46.1%)                    | 43 (56.6%)                       |                      |
| 30-39           | 266 (31.6%)                     | 86 (28.4%)                   |                      | 58 (30.4%)                      | 28 (25%)                            |                      | 35 (30.4%)                    | 23 (30.3%)                       |                      |
| 40-49           | 91 (10.8%)                      | 35 (11.6%)                   |                      | 22 (11.5%)                      | 13 (11.6%)                          |                      | 16 (13.9%)                    | 6 (7.9 %)                        |                      |
| 50+             | 44 (5.2 %)                      | 6 (2.0 %)                    |                      | 1 (0.5 %)                       | 5 (4.5%)                            |                      | 1 (0.9 %)                     | 0 (0.0 %)                        |                      |
| Missing         | 3                               | 4                            |                      | 4                               | 0                                   |                      | 3                             | 1                                |                      |
| CD4 count cell  |                                 |                              | 0.08                 |                                 |                                     | 0.07                 |                               |                                  | 0.27                 |
| 350-499         | 137 (18.0%)                     | 35 (15.6%)                   |                      | 21 (16.5%)                      | 14 (14.4%)                          |                      | 13 (17.8%)                    | 8 (14.8%)                        |                      |
| 500-749         | 376 (49.4%)                     | 100 (44.6%)                  |                      | 53 (41.7%)                      | 47 (48.5%)                          |                      | 34 (46.6%)                    | 19 (35.2%)                       |                      |
| 750+            | 248 (32.6%)                     | 89 (39.7%)                   |                      | 53 (41.7%)                      | 36 (37.1%)                          |                      | 26 (35.6%)                    | 27 (50.0%)                       |                      |
| Median (IQR)    | 644 (525–812)                   | 654 (540–892)                |                      | 659 (553–918)                   | 648 (534–862)                       |                      | 640 (553–885)                 | 734 (565–946)                    |                      |
| Missing         | 85                              | 83                           |                      | 68                              | 15                                  |                      | 45                            | 23                               |                      |

<sup>a</sup> p value comparing those in care and lost, using Rao-Scott correction to chi squared test to account for clustered sampling. Individuals with missing values excluded from comparison. <sup>b</sup> p value comparing those selected for tracing and not selected, calculated as described in footnote a. <sup>c</sup> p value comparing those successfully traced and those not found, calculated as described in footnote a

In both the uncorrected and corrected analysis of factors associated with loss from care, there was strong evidence that patients from rural clinics were more likely to be lost from care than those from urban clinics (adjusted(a)HR (uncorrected)=1.95, 95%CI = 1.68–2.27, p<0.001; aHR(corrected) =2.02, 95%CI=1.49–2.73, p<0.001; Table 2). There was some evidence that older patients were less likely to be lost from care than younger patients (aHR (uncorrected) =0.79 for each 10-year increase in age, 95%CI= 0.66–0.94, p=0.007; aHR(corrected)= 0.71; 95%CI= 0.54–0.93, p=0.01). In the corrected analysis, but not in the uncorrected, there was also weak evidence that males were more likely to be lost from care.

**Table 2. Factors associated with loss from care, estimated from Cox proportional hazards models, based on data in clinic registers (uncorrected) and corrected for the outcomes among patients who were successfully traced**

| Characteristics             | Uncorrected HR <sup>1</sup><br>(95% CI) | P value | Corrected HR <sup>1</sup><br>(95% CI) | P value |
|-----------------------------|-----------------------------------------|---------|---------------------------------------|---------|
| <b>Sociodemographic</b>     |                                         |         |                                       |         |
| Sex                         |                                         | 0.38    |                                       | 0.07    |
| Female                      | 1                                       |         |                                       |         |
| Male                        | 1.17(0.82, 1.68)                        |         | 1.39(0.97,1.99)                       |         |
| Age per 10 years            |                                         | 0.007   |                                       | 0.01    |
|                             | 0.79(0.66, 0.94)                        |         | 0.71(0.54,0.93)                       |         |
| Location                    |                                         | <0.001  |                                       | <0.001  |
| Urban                       | 1                                       |         | 1                                     |         |
| Rural                       | 1.95(1.68, 2.27)                        |         | 2.02(1.49, 2.73)                      |         |
| <b>Clinical<sup>2</sup></b> |                                         |         |                                       |         |
| CD4 count (per 100 cells)   |                                         | 0.22    |                                       | 0.41    |
|                             | 1.04(0.98, 1.10)                        |         | 1.05(0.93,1.20)                       |         |
| Weight per 10kgs            |                                         | <0.001  |                                       | <0.001  |
| Linear term                 | 0.94(0.80, 1.11)                        |         | 1.03(0.74, 1.42)                      |         |
| Quadratic term              | 1.03(1.02, 1.04)                        |         | 0.94(0.90, 0.98)                      |         |

<sup>1</sup>Sociodemographic variables adjusted for all sociodemographic variables in the table. Clinical variables adjusted for all variables in the table. <sup>2</sup>Analysis of associations with clinical variables restricted to urban patients.

Among patients from the urban clinics, in the uncorrected analysis, increasing weight at registration was the only clinical characteristic associated with loss from care.

After incorporating outcomes from the successfully tracked patients, weight at registration was still associated with loss from care, but the direction of the association had changed (Table 2).

Among the 71 patients who were successfully tracked and found not to be seeking care elsewhere, the main reasons for stopping care were that they lacked money for transport (37%), that they did not feel unwell (27%) or that they had moved to places without an HIV care facility (27%) (Table 3). Patients also reported that they lacked time (15%), purchased cotrimoxazole from other sources (14%) or did not believe that they were HIV positive (11%). The main reasons for stopping care among urban patients was not feeling unwell (41%) or having moved (39%). Among rural patients, the main reasons were lack of money for transport (50%) or that the clinic was too far away (43%)

**Table 3. Reported reasons for leaving care or changing clinics among 111 patients who were traced and found alive**

| Reason for no longer attending clinic  | No longer in care         |              |            |
|----------------------------------------|---------------------------|--------------|------------|
|                                        | Urban (N=41)              | Rural (N=30) | All (N=71) |
| Lack money for transport               | 11 (26.8%)                | 15 (50.0%)   | 26 (36.6%) |
| Does not feel sick                     | 17 (41.5%)                | 2 (6.7 %)    | 19 (26.8%) |
| Travelled/ moved away                  | 16 (39.0%)                | 3 (10.0%)    | 19 (26.8%) |
| Health centre is far away              | 5 (12.2%)                 | 13 (43.3%)   | 18 (25.4%) |
| Lack time                              | 8 (19.5%)                 | 3 (10.0%)    | 11 (15.5%) |
| Gets cotrimoxazole from other sources  | 7 (17.1%)                 | 3 (10.0%)    | 10 (14.1%) |
| Doubts HIV status                      | 4 (9.8 %)                 | 4 (13.3%)    | 8 (11.3%)  |
| Fear of being seen at the HIV clinic   | 0 (0.0 %)                 | 5 (16.7%)    | 5 (7.0 %)  |
| Does not like drugs/side effects       | 4 (9.8 %)                 | 1 (3.3 %)    | 5 (7.0 %)  |
| Using herbal/traditional medicines     | 0 (0.0 %)                 | 3 (10.0%)    | 3 (4.2 %)  |
| Other reason                           | 3 (7.3 %)                 | 2 (6.7 %)    | 5 (7.0 %)  |
| Reason for changing clinics            | In care at another clinic |              |            |
|                                        | Urban (N=23)              | Rural (N=17) | All (N=40) |
| Closer to work                         | 12 (52.2%)                | 6 (35.3%)    | 18 (45.0%) |
| Lack of money for transport            | 6 (26.1%)                 | 4 (23.5%)    | 10 (25.0%) |
| Less waiting time                      | 7 (30.4%)                 | 0 (0.0 %)    | 7 (17.5%)  |
| Lack time                              | 5 (21.7%)                 | 1 (5.9 %)    | 5 (12.5%)  |
| Friends/family attend                  | 3 (13.0%)                 | 0 (0.0 %)    | 3 (7.5 %)  |
| Fear of being seen at the first clinic | 3 (13.0%)                 | 1 (5.9 %)    | 3 (7.5 %)  |
| Better service                         | 1 (4.3 %)                 | 1 (5.9 %)    | 2 (5.0 %)  |
| Other reason                           | 1 (4.3 %)                 | 4 (23.5%)    | 5 (12.5%)  |

1  
2  
3  
4 Among the 40 patients who reported being in care at another clinic, the main  
5 reasons for changing clinics was that the new clinic was closer to work or home  
6 (45%), they lacked money for transport (25%) or the new clinics had less waiting  
7 time (17%). The new clinic being closer was cited as the main reason for changing  
8 for both urban and rural patients (52% and 35%, respectively).  
9  
10  
11  
12  
13  
14

## 15 **DISCUSSION**

16  
17 Much of the research that has been done regarding correction of estimates of  
18 retention in HIV care has concentrated on HIV positive individuals on ART. This  
19 study looked at individuals who had recently received an HIV diagnosis but were not  
20 yet eligible for ART. Based on the information from the clinic registers alone, loss  
21 from care was nearly 65% higher than after correcting for outcomes among  
22 individuals who were traced. We found that a third of the patients who were  
23 considered lost were continuing to access care at another clinic (silent transfers). We  
24 also identified deaths that had not been reported to the clinic. Other studies that  
25 have used a sampling based approach to correct estimates of retention among HIV  
26 positive individuals on ART have had similar findings.[11,14,15]  
27  
28  
29  
30  
31  
32  
33  
34

35 A study among HIV positive people in pre-ART care at two large clinics in Uganda in  
36 2008–2011 found that loss from care after 2.5 years was 30.5% but decreased to  
37 11.8% after correcting for outcomes in a sample of lost patients.[16] These figures  
38 are much lower than we found in our study in 2015, particularly in the rural clinics  
39 where corrected estimates of loss from care after 9 months were still 28.8%. The  
40 tracing period in our study was shorter and our definition of loss from care was more  
41 restrictive (3 months late to appointment vs 6 months late). Furthermore, some of the  
42 clinics in our study were smaller and more rural, so factors such as lack of transport  
43 or distance to the clinic may have presented greater barriers to retention. In the rural  
44 areas, patients often have to travel more than 10km on foot or bicycle to get to the  
45 clinics. Lastly, the CD4 threshold for ART eligibility in the earlier study was  $\leq 350$ , vs  
46  $\leq 500$  in 2015, so a larger proportion of patients in our study may have been  
47 asymptomatic and thus less motivated to remain in care.  
48  
49  
50  
51  
52  
53  
54  
55  
56  
57  
58  
59  
60



1  
2  
3  
4 Our estimates of retention, even after correction, are in line with previous studies in  
5 SSA that have shown poor retention among patients in pre-ART care. A recent  
6 review found a median of 53% of patients who had linked to pre-ART care were  
7 retained until the study endpoint.[17] Even among patients who have been identified  
8 as ART eligible, a not insignificant proportion may be lost before starting ART. A  
9 study of ART-eligible patients at a clinic in Uganda found 20% did not start ART  
10 within a year, with 8% dying whilst waiting to initiate ART.[10] Two separate reviews  
11 of retention in HIV care in SSA found that around a third of patients who were eligible  
12 for ART were lost before starting treatment.[5,18]. Factors associated with loss from  
13 care in this stage include facility-level barriers such as requirements for multiple  
14 clinic visits, inflexible clinic hours, lengthy waiting times and poor quality of care, and  
15 individual-level barriers such as fear of HIV disclosure, or limited understanding of  
16 HIV.[19]  
17  
18  
19  
20  
21  
22  
23  
24  
25  
26

27 With the new WHO 'treat all' guidelines, all individuals will be eligible to start ART  
28 immediately, but in practice there is likely to be a delay between linking to care after  
29 testing positive, and initiating treatment. Removing the CD4 eligibility threshold may  
30 increase the number of patients attending the clinics, which can put a strain on  
31 already overburdened health care systems. Many of the same barriers to ART  
32 initiation will remain under 'treat all' unless the process of starting ART is made more  
33 efficient. For successful implementation of the new guidelines, it will be essential to  
34 have accurate estimates of the proportion of people who disengage from care in the  
35 period before starting ART.  
36  
37  
38  
39  
40  
41  
42

43 In our study, most of the reported reasons for leaving care were economic (lack of  
44 money for transport, distance from the clinic) or health systems factors (moving to a  
45 location without an HIV care facility). These factors have been commonly cited in  
46 other studies, and are a challenge to providing lifelong HIV care in resource-limited  
47 settings. A systematic review of linkage to and retention in HIV care found that  
48 transport costs and distance were two of the main barriers to retention in pre-ART  
49 care.[19] A considerable number of patients reported obtaining cotrimoxazole from  
50 other sources, presumably in response to the challenges they faced attending the  
51 clinic. Psychological factors such as feeling well, or not believing that one was HIV  
52  
53  
54  
55  
56  
57  
58  
59  
60



1  
2  
3 positive, were also cited as reasons for leaving care, especially among urban  
4 patients. As has been reported in other studies, we found that younger patients  
5 were more likely to be lost from care.[19] These findings suggest that a combination  
6 of interventions may be required to improve retention in care.  
7  
8  
9

10  
11 We used a pragmatic approach to correct our estimates of loss from care,  
12 arithmetically upweighting the outcomes of patients who were tracked successfully to  
13 represent those of patients who were lost. Other methods have been proposed for  
14 incorporating these outcomes, including using regression models to estimate the  
15 inverse probability weights, and multiple imputation in conjunction with the  
16 ascertained outcomes. Simulations have shown that these strategies all provide less  
17 biased results than the standard uncorrected approach that is used in many  
18 epidemiological studies.[20]  
19  
20  
21  
22  
23  
24

25  
26 Our study has several limitations. We traced only a sample of patients who were lost,  
27 and were able to find 60% of those who were selected for tracing. The individuals  
28 that we found may not have been representative of all patients who were lost.  
29 Although there was no evidence that the characteristics of those who were  
30 successfully traced were different from those who were not found, our small sample  
31 size means that we may not have had power to detect true differences if they  
32 existed, and possible bias in our estimates may still remain. In addition, we looked at  
33 loss from care over a fairly short period (9 months); it is possible that some of the  
34 individuals defined as lost based on the clinic registers would have returned to the  
35 clinic at a later date. For the individuals who were successfully traced, we relied on  
36 self-report to define whether an individual was still in care at another clinic, which  
37 may have led to over-reporting of care. Our analysis of factors associated with loss  
38 from care was limited by the small number of covariates and the large amount of  
39 missing data in the clinic databases particularly from the rural areas. Our findings  
40 from government clinics in Uganda may not be generalisable across all HIV  
41 treatment programmes in SSA, where reasons for disengagement from care, and  
42 outcomes after disengagement, may differ.  
43  
44  
45  
46  
47  
48  
49  
50  
51  
52  
53

54  
55 In summary, we found that estimates of loss from pre-ART care using a sampling  
56 based approach were substantially lower than those based on the clinic registers  
57  
58  
59

1  
2  
3 alone. Retention was much lower in rural clinics than in urban clinics and was in line  
4 with previous reports of pre-ART retention in SSA. Structural factors were a key  
5 barrier to retention. These findings may have implications for the successful  
6 implementation of the 'treat all' guidelines, and retention in care among individuals  
7 with high CD4 counts in similar resource-limited settings.  
8  
9  
10  
11  
12  
13  
14  
15  
16  
17  
18  
19  
20  
21  
22  
23  
24  
25  
26  
27  
28  
29  
30  
31  
32  
33  
34  
35  
36  
37  
38  
39  
40  
41  
42  
43  
44  
45  
46  
47  
48  
49  
50  
51  
52  
53  
54  
55  
56  
57  
58  
59  
60

## Acknowledgements

We acknowledge the Kampala City Council Authority clinic staff and officials, the Infectious Disease Institute Outreach team, and the HIV care centres in Hoima and Kabaale (Dwoli health centre III, Kigoroby health centre IV and Kagadi hospital) for their support and collaboration. We thank the study participants for their participation and the project staff for their work. We acknowledge the assistance of the Statistics unit at the Infectious Disease Institute.

## Competing interests

All authors have completed the ICMJE uniform disclosure form at [www.icmje.org/coi\\_disclosure.pdf](http://www.icmje.org/coi_disclosure.pdf) and declare: PN and JB had research grant support from EDCTP for the submitted work; KB and JB receive research grants from MRC UK and DFID; no financial relationships with any organisations that might have an interest in the submitted work in the previous three years; no other relationships or activities that could appear to have influenced the submitted work.

## Funding

This work was supported by the European & Developing Countries Clinical Trials Partnership (EDCTP) through project MF.2013.40205.020; however, EDCTP cannot accept any responsibility for information or views expressed herein. JB and KB receive support from the MRC UK and DFID (MRC grant number G0700837).

## Author contribution

PN, ANK, JB and KB conceived and designed the study. PN, ANK and AK conducted the study. PN analysed the data and developed the first draft. ANK, JB and KB advised on data analysis. All authors contributed to the interpretation of the data, revised the article critically and approved the final version.

### Data sharing statement

The original data can only be accessed by the research investigators at the Infectious Disease Institute. PN can be contacted if anonymised data or the statistical code are required.

For peer review only

## REFERENCES

1. World Health Organization. Progress report 2016: prevent HIV, test and treat all: WHO support for country impact. Geneva, Switzerland; 2016.
2. Stover J, Bollinger L, Izazola JA, et al., What is required to end the AIDS epidemic as a public health threat by 2030? The cost and impact of the fast-track approach. *PLoS ONE* 2016;11(5):e0154893.
3. UNAIDS. 90-90-90 An ambitious treatment target to help end the AIDS epidemic. Geneva, Switzerland 2014. Available from <http://www.unaids.org/en/resources/documents/2017/90-90-90>.
4. Kisesa A, Chamla D. Getting to 90–90–90 targets for children and adolescents HIV in low and concentrated epidemics: bottlenecks, opportunities, and solutions. *Curr Opin HIV AIDS* 2016;11(Suppl1):S1.
5. Kranzer K, Govindasamy D, Ford N, et al. Quantifying and addressing losses along the continuum of care for people living with HIV infection in sub-Saharan Africa: a systematic review. *J Int AIDS Soc* 2012;15(2):17383
6. World Health Organization. Consolidated guidelines on the use of antiretroviral drugs for treating and preventing HIV infection. Recommendations for a public health approach. Second edition. Geneva, Switzerland; 2016.
7. Fox M, Rosen A. new cascade of HIV care for the era of 'treat all'. *PLoS Medicine* 2017;14(4):e1002268.
8. Geng EH, Glidden DV, Bwana MB, et al. Retention in care and connection to care among HIV-infected patients on antiretroviral therapy in Africa: estimation via a sampling-based approach. *PLoS ONE* 2011;6(7):e21797.
9. Tweya H, Feldacker C, Estill J, et al. Are they really lost? 'True' status and reasons for treatment discontinuation among HIV infected patients on antiretroviral therapy considered lost to follow up in urban Malawi. *PLoS ONE* 2013;8(9):e75761.
10. Geng EH, Bwana MB, Muyindike W, et al. Failure to initiate antiretroviral therapy, loss to follow-up and mortality among HIV-infected patients during the pre-ART period in Uganda. *J Acquir Immune Defic Syndr* 2013;63(2):e64-71.

- 1  
2  
3 11. Geng EH, Glidden DV, Emenyonu N, et al. Tracking a sample of patients lost  
4 to follow-up has a major impact on understanding determinants of survival in  
5 HIV-infected patients on antiretroviral therapy in Africa. *Trop Med Int Health*,  
6 2010;15(Suppl1):63-69.  
7
- 8  
9 12. Geng EH, Emenyonu N, Bwana MB, et al. Sampling-based approach to  
10 determining outcomes of patients lost to follow-up in antiretroviral therapy  
11 scale-up programs in Africa. *JAMA* 2008;300(5):506-507.  
12
- 13 13. Geng EH, Odeny TA, Lyamuya R, et al. Retention in care and patient-  
14 reported reasons for undocumented transfer or stopping care among HIV-  
15 infected patients on antiretroviral therapy in Eastern Africa: application of a  
16 sampling-based approach. *Clin Infect Dis* 2015:civ1004.  
17
- 18 14. Kiragga AN, Castelnuovo B, Musomba R, et al. Comparison of methods for  
19 correction of mortality estimates for loss to follow-up after ART initiation: a  
20 case of the Infectious Diseases Institute, Uganda. *PLoS ONE*  
21 2013;8(12):e83524.  
22
- 23 15. Egger M, Spycher BD, Sidle J, et al. Correcting mortality for loss to follow-up:  
24 a nomogram applied to antiretroviral treatment programmes in sub-Saharan  
25 Africa. *PLoS Med*, 2011;8(1):e1000390.  
26
- 27 16. Namusoby J, Semitala FC, Amanyire G, et al. High retention in care among  
28 HIV-infected patients entering care with CD4 levels >350 cells/uL under  
29 routine program conditions in Uganda. *Clin Infect Dis* 2013;57(9):1343-1350.  
30
- 31 17. Plazy M, Orne-Gliemann J, Dabis F, et al. Retention in care prior to  
32 antiretroviral treatment eligibility in sub-Saharan Africa: a systematic review of  
33 the literature. *BMJ Open* 2015;5(6):e006927.  
34
- 35 18. Rosen S, Fox MP. Retention in HIV care between testing and treatment in  
36 sub-Saharan Africa: a systematic review. *PLoS Med* 2011;8(7):e1001056.  
37
- 38 19. Govindasamy D, Ford N, Kranzer K. Risk factors, barriers and facilitators for  
39 linkage to antiretroviral therapy care: a systematic review. *AIDS*  
40 2012;26(16):2059-2067.  
41
- 42 20. Schomaker M, Gsponer T, Estill J, et al. Non-ignorable loss to follow-up:  
43 correcting mortality estimates based on additional outcome ascertainment.  
44 *Stat Med* 2014;33(1):129-142.  
45  
46  
47  
48  
49  
50  
51  
52  
53  
54  
55  
56  
57  
58  
59  
60

**Figure 1: Uncorrected and corrected cumulative incidence of loss from care among patients with CD4 >500 registered for HIV care at 6 clinics**

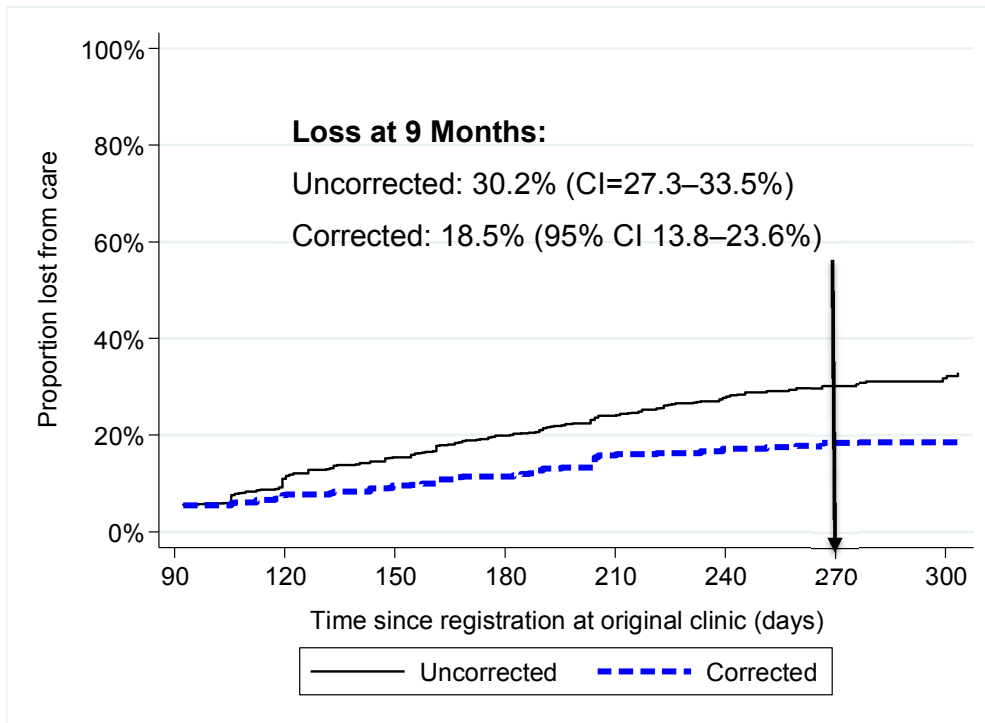

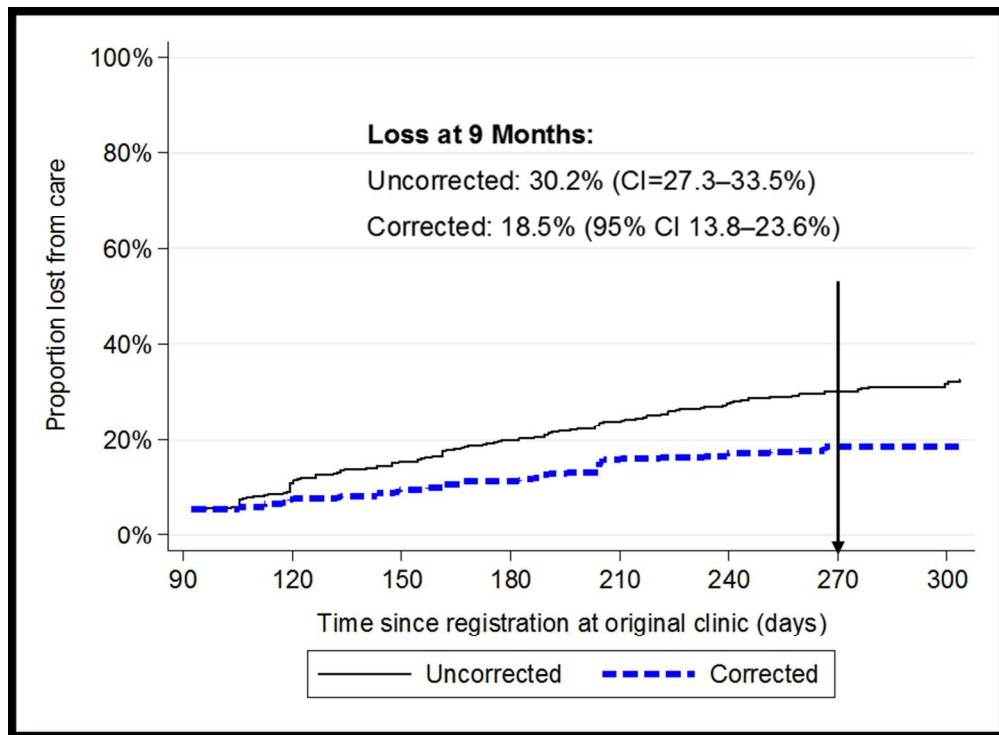

Figure 1: Uncorrected and corrected cumulative incidence of loss from care among patients with CD4 >500 registered for HIV care at 6 clinics

78x57mm (300 x 300 DPI)



**STROBE 2007 (v4) checklist of items to be included in reports of observational studies in epidemiology\***  
**Checklist for cohort, case-control, and cross-sectional studies (combined)**

| Section/Topic             | Item # | Recommendation                                                                                                                                                                                                                                                                                                                                                                                                                                                         | Reported on page # |
|---------------------------|--------|------------------------------------------------------------------------------------------------------------------------------------------------------------------------------------------------------------------------------------------------------------------------------------------------------------------------------------------------------------------------------------------------------------------------------------------------------------------------|--------------------|
| Title and abstract        | 1      | (a) Indicate the study’s design with a commonly used term in the title or the abstract                                                                                                                                                                                                                                                                                                                                                                                 | 1                  |
|                           |        | (b) Provide in the abstract an informative and balanced summary of what was done and what was found                                                                                                                                                                                                                                                                                                                                                                    | 2                  |
| <b>Introduction</b>       |        |                                                                                                                                                                                                                                                                                                                                                                                                                                                                        |                    |
| Background/rationale      | 2      | Explain the scientific background and rationale for the investigation being reported                                                                                                                                                                                                                                                                                                                                                                                   | 4                  |
| Objectives                | 3      | State specific objectives, including any pre-specified hypotheses                                                                                                                                                                                                                                                                                                                                                                                                      | 5                  |
| <b>Methods</b>            |        |                                                                                                                                                                                                                                                                                                                                                                                                                                                                        |                    |
| Study design              | 4      | Present key elements of study design early in the paper                                                                                                                                                                                                                                                                                                                                                                                                                | 5, 6               |
| Setting                   | 5      | Describe the setting, locations, and relevant dates, including periods of recruitment, exposure, follow-up, and data collection                                                                                                                                                                                                                                                                                                                                        | 5, 6               |
| Participants              | 6      | (a) <i>Cohort study</i> —Give the eligibility criteria, and the sources and methods of selection of participants. Describe methods of follow-up<br><i>Case-control study</i> —Give the eligibility criteria, and the sources and methods of case ascertainment and control selection. Give the rationale for the choice of cases and controls<br><i>Cross-sectional study</i> —Give the eligibility criteria, and the sources and methods of selection of participants | 6,7                |
|                           |        | (b) <i>Cohort study</i> —For matched studies, give matching criteria and number of exposed and unexposed<br><i>Case-control study</i> —For matched studies, give matching criteria and the number of controls per case                                                                                                                                                                                                                                                 |                    |
| Variables                 | 7      | Clearly define all outcomes, exposures, predictors, potential confounders, and effect modifiers. Give diagnostic criteria, if applicable                                                                                                                                                                                                                                                                                                                               | 6-8                |
| Data sources/ measurement | 8*     | For each variable of interest, give sources of data and details of methods of assessment (measurement). Describe comparability of assessment methods if there is more than one group                                                                                                                                                                                                                                                                                   | 6, 7               |
| Bias                      | 9      | Describe any efforts to address potential sources of bias                                                                                                                                                                                                                                                                                                                                                                                                              | 7-8                |
| Study size                | 10     | Explain how the study size was arrived at                                                                                                                                                                                                                                                                                                                                                                                                                              | 6                  |
| Quantitative variables    | 11     | Explain how quantitative variables were handled in the analyses. If applicable, describe which groupings were chosen and why                                                                                                                                                                                                                                                                                                                                           | 7-8                |
| Statistical methods       | 12     | (a) Describe all statistical methods, including those used to control for confounding                                                                                                                                                                                                                                                                                                                                                                                  | 7-8                |
|                           |        | (b) Describe any methods used to examine subgroups and interactions                                                                                                                                                                                                                                                                                                                                                                                                    | 7-8                |
|                           |        | (c) Explain how missing data were addressed                                                                                                                                                                                                                                                                                                                                                                                                                            | 8                  |
|                           |        | (d) <i>Cohort study</i> —If applicable, explain how loss to follow-up was addressed<br><i>Case-control study</i> —If applicable, explain how matching of cases and controls was addressed                                                                                                                                                                                                                                                                              | 8                  |

|                          |     |                                                                                                                                                                                                              |           |
|--------------------------|-----|--------------------------------------------------------------------------------------------------------------------------------------------------------------------------------------------------------------|-----------|
|                          |     | <i>Cross-sectional study</i> —If applicable, describe analytical methods taking account of sampling strategy <sup>8</sup>                                                                                    |           |
|                          |     | (e) Describe any sensitivity analyses                                                                                                                                                                        | 8         |
| <b>Results</b>           |     |                                                                                                                                                                                                              |           |
| Participants             | 13* | (a) Report numbers of individuals at each stage of study—eg numbers potentially eligible, examined for eligibility, confirmed eligible, included in the study, completing follow-up, and analysed            | 8-9       |
|                          |     | (b) Give reasons for non-participation at each stage                                                                                                                                                         | 9         |
|                          |     | (c) Consider use of a flow diagram                                                                                                                                                                           | N/A       |
| Descriptive data         | 14* | (a) Give characteristics of study participants (eg demographic, clinical, social) and information on exposures and potential confounders                                                                     | 9         |
|                          |     | (b) Indicate number of participants with missing data for each variable of interest                                                                                                                          | 10        |
|                          |     | (c) <i>Cohort study</i> —Summarise follow-up time (eg, average and total amount)                                                                                                                             |           |
| Outcome data             | 15* | <i>Cohort study</i> —Report numbers of outcome events or summary measures over time                                                                                                                          | 9, 11     |
|                          |     | <i>Case-control study</i> —Report numbers in each exposure category, or summary measures of exposure                                                                                                         |           |
|                          |     | <i>Cross-sectional study</i> —Report numbers of outcome events or summary measures                                                                                                                           |           |
| Main results             | 16  | (a) Give unadjusted estimates and, if applicable, confounder-adjusted estimates and their precision (eg, 95% confidence interval). Make clear which confounders were adjusted for and why they were included | 9, 11, 12 |
|                          |     | (b) Report category boundaries when continuous variables were categorized                                                                                                                                    | N/A       |
|                          |     | (c) If relevant, consider translating estimates of relative risk into absolute risk for a meaningful time period                                                                                             | N/A       |
| Other analyses           | 17  | Report other analyses done—eg analyses of subgroups and interactions, and sensitivity analyses                                                                                                               | 9, 11     |
| <b>Discussion</b>        |     |                                                                                                                                                                                                              |           |
| Key results              | 18  | Summarise key results with reference to study objectives                                                                                                                                                     | 13        |
| Limitations              | 19  | Discuss limitations of the study, taking into account sources of potential bias or imprecision. Discuss both direction and magnitude of any potential bias                                                   | 15        |
| Interpretation           | 20  | Give a cautious overall interpretation of results considering objectives, limitations, multiplicity of analyses, results from similar studies, and other relevant evidence                                   | 15,16     |
| Generalisability         | 21  | Discuss the generalisability (external validity) of the study results                                                                                                                                        | 15        |
| <b>Other information</b> |     |                                                                                                                                                                                                              |           |
| Funding                  | 22  | Give the source of funding and the role of the funders for the present study and, if applicable, for the original study on which the present article is based                                                | 17        |

\*Give information separately for cases and controls in case-control studies and, if applicable, for exposed and unexposed groups in cohort and cross-sectional studies.

**Note:** An Explanation and Elaboration article discusses each checklist item and gives methodological background and published examples of transparent reporting. The STROBE checklist is best used in conjunction with this article (freely available on the Web sites of PLoS Medicine at <http://www.plosmedicine.org/>, Annals of Internal Medicine at <http://www.annals.org/>, and Epidemiology at <http://www.epidem.com/>). Information on the STROBE Initiative is available at [www.strobe-statement.org](http://www.strobe-statement.org).

# BMJ Open

## Correction of estimates of retention in care among a cohort of HIV-positive patients in Uganda in the period before starting ART: a sampling-based approach

|                                 |                                                                                                                                                                                                                                                                                                                                                                                                                                                                                                                                                                         |
|---------------------------------|-------------------------------------------------------------------------------------------------------------------------------------------------------------------------------------------------------------------------------------------------------------------------------------------------------------------------------------------------------------------------------------------------------------------------------------------------------------------------------------------------------------------------------------------------------------------------|
| Journal:                        | <i>BMJ Open</i>                                                                                                                                                                                                                                                                                                                                                                                                                                                                                                                                                         |
| Manuscript ID                   | bmjopen-2017-017487.R1                                                                                                                                                                                                                                                                                                                                                                                                                                                                                                                                                  |
| Article Type:                   | Research                                                                                                                                                                                                                                                                                                                                                                                                                                                                                                                                                                |
| Date Submitted by the Author:   | 05-Dec-2017                                                                                                                                                                                                                                                                                                                                                                                                                                                                                                                                                             |
| Complete List of Authors:       | Nyakato, Patience; London School of Hygiene and Tropical Medicine, Infectious Disease Epidemiology; Infectious Disease Institute, Makerere University<br>Kiragga, Agnes; Infectious Disease Institute, Makerere University<br>Kambugu, Andrew; Infectious Disease Institute, Makerere University<br>Bradley, John; London School of Hygiene and Tropical Medicine, MRC Tropical Epidemiology Group, Infectious Disease Epidemiology<br>Baisley, Kathy; London School of Hygiene and Tropical Medicine, MRC Tropical Epidemiology Group, Infectious Disease Epidemiology |
| <b>Primary Subject Heading</b>: | HIV/AIDS                                                                                                                                                                                                                                                                                                                                                                                                                                                                                                                                                                |
| Secondary Subject Heading:      | Epidemiology, HIV/AIDS, Global health, Health services research                                                                                                                                                                                                                                                                                                                                                                                                                                                                                                         |
| Keywords:                       | HIV & AIDS < INFECTIOUS DISEASES, Retention, Loss to follow up, CD4, pre-ART, Africa                                                                                                                                                                                                                                                                                                                                                                                                                                                                                    |
|                                 |                                                                                                                                                                                                                                                                                                                                                                                                                                                                                                                                                                         |

SCHOLARONE™  
Manuscripts

1  
2  
3 **Correction of estimates of retention in care among a cohort of HIV-positive**  
4 **patients in Uganda in the period before starting ART: a sampling-based**  
5 **approach**  
6  
7

8  
9 Patience Nyakato<sup>1,2</sup>, Agnes N Kiragga<sup>2</sup>, Andrew Kambugu<sup>2</sup>, John Bradley<sup>1\*</sup>, Kathy  
10 Baisley<sup>1\*</sup>  
11  
12

13  
14  
15 <sup>1</sup>MRC Tropical Epidemiology Group, Department of Infectious Disease  
16 Epidemiology, London School of Hygiene and Tropical Medicine, London, UK;

17  
18 <sup>2</sup>Infectious Diseases Institute, College of Health Sciences, Makerere University,  
19 Kampala, Uganda  
20  
21

22  
23 \*These authors are joint senior authors on this work.  
24  
25

26  
27  
28 **Corresponding author:** Patience Nyakato; Infectious Disease Institute, Mulago  
29 Hospital Complex, College of Health Sciences, Makerere University, PO Box 22418,  
30 Kampala, Uganda. Email: [panyakato2@gmail.com](mailto:panyakato2@gmail.com) Telephone: +256 787437316;  
31 Fax: +256 414 307290  
32  
33  
34  
35  
36  
37  
38

39 Word count: 4314  
40  
41  
42  
43  
44  
45  
46  
47  
48  
49  
50  
51  
52  
53  
54  
55  
56  
57  
58  
59  
60

## ABSTRACT

**Objective:** The aim of this study was to use a sampling-based approach to obtain estimates of retention in HIV care before initiation of antiretroviral treatment (ART), corrected for outcomes in patients who were lost according to clinic registers.

**Design:** Retrospective cohort study of HIV positive individuals not yet eligible for ART (CD4 >500)

**Setting:** 3 urban and 3 rural HIV care clinics in Uganda; information was extracted from the clinic registers for all patients who had registered for pre-ART care between January–August 2015

**Participants:** A random sample of patients who were lost according to the clinic registers (>3 months late to scheduled visit) was traced to ascertain their outcomes.

**Outcome measures:** The proportion of patients lost from care was estimated using a competing risks approach, first based on the information in the clinic records alone and then using inverse probability weights to incorporate the results from tracing. Cox regression was used to determine factors associated with loss from care.

**Results:** Of 1153 patients registered for pre-ART care (68% female, median age 29 years, median CD4 count 645 cells/uL), 307 (27%) were lost according to clinic records. Among these, 195 (63%) were selected for tracing; outcomes were ascertained in 118 (61%). Seven patients (6%) had died, 40 (34%) were in care elsewhere, and 71 (60%) were out of care. Loss from care at 9 months was 30.2% (95% confidence interval (CI)=27.3%–33.5%). After incorporating outcomes from tracing, loss from care decreased to 18.5% (95%CI 13.8%–23.6%).

**Conclusion:** Estimates of loss from HIV care may be too high if based on routine clinic data alone. A sampling based approach is a feasible way of obtaining more accurate estimates of retention, accounting for transfers to other clinics.

**Key words:** HIV, retention in care, loss to follow up, pre-ART, CD4, Africa

## Article Summary

### Strengths and limitations of this study

- Most studies that use tracing to estimate retention in care focus on HIV-positive individuals on ART; this is one of few studies to apply these methods in the period before ART initiation.
- A sampling based approach is feasible and provides an opportunity to obtain more accurate estimates of retention in HIV care programmes in resource-limited settings
- Outcomes were not ascertained in all patients who were traced, so individuals who were traced successfully may not be representative of all who were lost.
- The follow-up time was relatively short, so some patients who were considered lost according to the clinic registers may have returned to the clinic at a later date.

## INTRODUCTION

Access to antiretroviral therapy (ART) has expanded considerably in sub-Saharan Africa (SSA), with 12 million people in the region receiving ART in 2016.[1] With the UNAIDS 90-90-90 targets (90% of HIV positive individuals know their status, 90% of those diagnosed are on ART and 90% of those on ART are virally suppressed by 2020), more HIV positive individuals are expected to be on ART and attain viral suppression.[2-4] However, although treatment coverage in SSA doubled between 2010 and 2015, estimated coverage was still only 47% in 2015, and HIV-related mortality remains high, partly due to loss from care.[1,2]

Major gaps in HIV treatment programmes include linking individuals who test HIV positive to care, and prompt initiation of ART. Previous WHO treatment guidelines were based on CD4 count thresholds, with pre-ART care focused on immunological monitoring until individuals became eligible for ART. A 2012 systematic review of retention in HIV care in SSA found a median of 57% of individuals returned for CD4 count results after testing HIV-positive, and among those who received their results, 45% remained in care until they became eligible for ART.[5] Even among those who were ART eligible, only a median of 66% initiated ART[5].

The WHO released new HIV treatment guidelines in 2015, recommending that ART be offered to all HIV positive individuals irrespective of CD4 count.[6] If widely implemented, the 'treat all' approach would contribute significantly to achieving the 90-90-90 goals. As of end 2016, many countries in SSA had begun implementing the new guidelines. However, several countries had introduced the guidelines only in selected treatment sites, and others had not yet adopted the new policy.[1] Scale-up of ART treatment for all HIV positive people in resource-limited settings will require broad health systems strengthening, which in practice may mean that, for budgetary or other practical reasons, some clinics may still use CD4 counts to prioritise starting treatment. Uganda officially rolled out the test and treat guidelines in November 2016. By end 2017, nearly all government clinics had implemented test and treat. However, in practice, priority for ART initiation is given to existing patients in pre-ART care. Furthermore, ART 'stock outs' are still common, so individuals who

1  
2  
3 are newly diagnosed are likely to have some period of pre-ART care. In March  
4 2017, an estimated 6% of HIV positive persons who were enrolled in HIV care were  
5 not on ART.[7] In addition, 48% of men who had tested HIV positive have not yet  
6 initiated ART.[7]  
7  
8  
9

10  
11 Under the 'treat all' guidelines, many individuals who are entering HIV care will have  
12 high CD4 counts and be asymptomatic, and therefore face different barriers to  
13 starting ART. Losses between testing HIV positive and ART initiation are still likely to  
14 remain. Obtaining accurate estimates of loss from care and outcomes in this stage  
15 will be important for evaluating the impact of the 'treat all' guidelines, and for  
16 designing interventions to improve retention and increase the numbers starting  
17 ART.[8]  
18  
19  
20  
21  
22  
23

24 Standard estimates of retention consider those who are lost to represent  
25 disengagement from care. However, many of those lost may include transfers to  
26 other care centres.[9,10] In rural Uganda, estimates of patient retention 3 years after  
27 initiating ART increased from 60% to 85% when corrected for outcomes among  
28 those who were lost.[9,11] Therefore, estimates of retention that consider patients  
29 who are lost from care to have disengaged from care are biased, and may result in  
30 misdirection of resources at the clinic and national levels.  
31  
32  
33  
34  
35  
36

37 We used a sampling-based approach to obtain more accurate estimates of loss from  
38 pre-ART care among HIV positive individuals attending clinics in Uganda who were  
39 not yet eligible for ART. This approach involves tracing a sample of lost patients and  
40 using a weighted analysis to correct the estimates of retention in the entire clinic  
41 population, with the assumption that the traced patients are representative of all who  
42 were lost.[12-14] We also explore the effect of this approach on estimates of  
43 mortality, and factors associated with loss from care before ART initiation.  
44  
45  
46  
47  
48  
49  
50  
51  
52  
53  
54  
55  
56  
57  
58  
59  
60



## METHODS

### Study setting

This was a retrospective cohort study of patients who had registered in pre-ART HIV care at 6 government clinics in Uganda: 3 urban Kampala city municipal clinics (Kisenyi, Kawala and Kitebi) which are managed by the Kampala City Council Authority (KCCA), and 3 rural health centres in Hoima and Kibaale districts in western Uganda, which are run by the Uganda Ministry of Health. The 3 urban clinics are level IV health centres, which have a target catchment population of 100,000. Kisenyi is the largest of these, and serves a particularly economically impoverished area. The rural facilities included one level IV (Kiogorobya) and one level III (Dwoli) health centre in Hoima district, and Kagadi District Hospital in Kibaale district. Hoima district had an estimated population of 574,000 in the 2014 census, and Kibaale had an estimated population of 789,000.

All 6 facilities are supported by the Infectious Diseases Institute (IDI), Makerere University and offer integrated HIV testing and care facilities, provision of ART, and laboratory support. Most persons attend the HIV counselling and testing facilities as walk-ins. Individuals who test positive are referred for care within the clinic, or a preferred alternate facility, for immediate CD4 testing. Individuals are registered at the clinic at the time of initiating CD4 testing. They are then asked to return to the clinic within two weeks for their CD4 results. At the time of the study (2015), individuals who were not yet eligible for ART were enrolled in a general pre-ART HIV care programme, and visited the clinic every 3 months for routine clinic check-ups and cotrimoxazole prophylaxis. In 2015, the CD4 count threshold for ART initiation was  $\leq 500$  cells/uL; however, in practice, priority was given to individuals with CD4 counts  $< 350$ . The 3 Kampala clinics are among 7 KCCA clinics supported by IDI; in June 2015, there were 33,514 HIV positive persons receiving HIV care services in these facilities, of whom 87% were on ART[15]

### Study design

A list of all individuals who tested HIV positive between January-May 2015 (Kampala clinics) and January-August 2015 (rural clinics) and were not yet eligible for ART was

1  
2  
3 obtained from the routine clinic records. Socio-demographic and routine clinical data  
4 for patients attending the Kampala clinics was extracted using the electronic patient  
5 records system (OpenMRS). For patients attending the rural clinics, the information  
6 was manually extracted from the paper-based clinic records, and entered into an  
7 Access database. Patients were then classified as either i) still in care; ii) transferred  
8 out to another clinic; iii) died; or iv) lost to follow-up, based on the information  
9 available from the clinic records. Patients were counted as lost to follow-up if they  
10 were 3 or more months late for their last scheduled visit at the clinic, and not known  
11 to have transferred out or to have died.  
12  
13  
14  
15  
16  
17  
18

19 From the sampling frame of all patients who were classified as lost, a random  
20 sample was selected, separately for urban clinics and rural clinics, for intensive  
21 tracing. The size of the sample was based on practical considerations of how many  
22 patients could be traced at each clinic with available resources, rather than on formal  
23 sample size calculations.  
24  
25  
26  
27  
28

29 Tracing was done between November 2015–March 2016 in both the urban and rural  
30 clinics. Tracers attempted to contact patients through phone calls and home visits,  
31 using addresses and locator forms containing secondary phone numbers, areas of  
32 residence, and a map to the area of residence. For patients who could not be  
33 contacted through phone calls, home visits using locator forms were used; at least 3  
34 visit attempts were made before declaring the patient unreachable.  
35  
36  
37  
38  
39

40 Patients who were successfully traced were asked to provide information about their  
41 current HIV care status: whether they were registered elsewhere and were attending  
42 another clinic; whether they had started ART elsewhere; and reasons for  
43 withdrawing from HIV care if not attending any HIV care facility. Patient deaths were  
44 ascertained through an interview with a close informant.  
45  
46  
47  
48  
49

50 Individuals were considered to have disengaged from care if they had not registered  
51 at any other clinic and had not returned to the clinic where they were originally  
52 registered for more than 3 months after their last scheduled visit. Individuals who  
53 said they were purchasing cotrimoxazole directly from the pharmacy (i.e. not under  
54 clinician's care) or they obtained drugs through relatives/friends were also  
55  
56  
57  
58  
59  
60

1  
2  
3 considered to have disengaged from care. Individuals who reported to have  
4 registered at another clinic were asked the name of the other clinic, the date of their  
5 next appointment, and for evidence of registration such as a patient card with a  
6 current appointment date. Those who had a current patient card, or gave a valid  
7 name of an HIV care clinic with a current appointment date, were considered to be in  
8 care.  
9  
10  
11  
12  
13

14 Interviews were conducted by trained nurse counsellors, all of whom had previous  
15 research experience. Information was collected using a standard structured  
16 questionnaire. The nurse counsellors made the contact attempts by telephone, and  
17 traced urban patients at their homes if the information on the locator form was  
18 sufficient. Many of the rural patients could not be reached by telephone, and the  
19 information on the locator forms was inadequate. Therefore, in the rural clinics,  
20 'expert' patients from each clinic were paired with the nurse interviewers to help  
21 trace patients in the community. Expert patients also helped with tracing in the urban  
22 clinics, for patients who could not be found through the locator forms. Expert  
23 patients serve as community volunteers at the clinic, and offer support to fellow  
24 patients in HIV care. They are familiar with the surrounding community and are often  
25 called on by the clinic to help trace persons on ART who have missed their visits.  
26  
27  
28  
29  
30  
31  
32  
33  
34

### 35 **Statistical analysis**

36  
37  
38 Descriptive statistics (proportions, means, medians and interquartile ranges) were  
39 used to summarise baseline characteristics. Characteristics of patients who were  
40 retained in pre-ART care and those who were lost were tabulated and compared  
41 using Chi square tests, with the Rao-Scott correction to account for correlation within  
42 clinics. In addition, characteristics of patients who were selected for tracing and  
43 traced successfully were compared with those who were selected but could not be  
44 found.  
45  
46  
47  
48  
49

50  
51 First, using only the information available from the clinic records, the proportion of  
52 patients who were lost from pre-ART care was estimated using a cumulative  
53 incidence approach, where deaths known to the clinics were treated as a competing  
54 risk. Observation time began on the date of registration at the clinic (i.e. the date of  
55  
56  
57  
58  
59  
60

1  
2  
3 presenting for CD4 testing after HIV diagnosis) and ended at the earliest of the date  
4 of known transfer out, death, loss from care (defined as 3 months after last missed  
5 appointment) or review of the clinic records (for individuals who were still in care).  
6 Patients who initiated ART were censored on the date of ART initiation. Then, a  
7 corrected analysis was conducted using the same approach but incorporating the  
8 outcomes obtained from tracing. The outcomes of patients who were successfully  
9 traced were weighted using inverse probability weights, calculated as the inverse  
10 proportion of patients who were successfully traced among all patients who were  
11 lost. Patients who could not be found, or who were not selected for tracing, were  
12 given a weight of 0. Patients who were still in care according to the clinic registers  
13 were given a weight of 1. Weights were calculated separately for each clinic. For  
14 example, in a clinic with 100 patients of whom 30 were lost, 10 were successfully  
15 traced and 6 were found to be still in care, the weights for the patients who were  
16 traced would be  $30/10=3$ . The corrected estimate for the proportion in care would be  
17 calculated as:  $[70 \times 1 + 6 \text{ (found to be still in care)} \times 3] / [70 \times 1 + 6 \times 3 + 4 \text{ (found to}$   
18  $\text{be out of care)} \times 3] = 88/100$ . For individuals who were traced and found to still be in  
19 care, observation time was considered to end at the date of interview. Individuals  
20 who were traced and found to be alive but not in care were considered to have been  
21 lost 3 months after their last missed appointment at the original clinic.  
22  
23  
24  
25  
26  
27  
28  
29  
30  
31  
32  
33

34  
35 A sensitivity analysis was also done: first we assumed that all individuals who were  
36 traced and not found were alive and in care elsewhere; second, we assumed that all  
37 patients who were not found were alive but not in care. Confidence intervals for the  
38 weighted estimates were obtained through bootstrapping using percentiles of the  
39 bootstrap distribution with 2000 replications.  
40  
41  
42  
43  
44

45 Cox proportional hazards models were fitted to examine factors associated with loss  
46 from care, using data from the clinic registers alone and in a weighted analysis after  
47 incorporating results from tracing. Robust standard errors were used to account for  
48 correlation within clinics. Owing to the small number of covariates available, all  
49 variables were included in the final multivariate model. In the rural clinics, data on  
50 clinical covariates were often missing from the patient records; therefore, the  
51 analysis of clinical covariates was restricted to patients from the urban clinics. The  
52 appropriate functional forms of continuous covariates were explored using low order  
53  
54  
55  
56  
57  
58  
59  
60

1  
2  
3 polynomials (quadratic and cubic forms). All analyses were done using STATA  
4 version 14.2 (Stata Corp, College Station, Texas).  
5  
6

## 7 8 **Ethics** 9

10 Ethical approvals were obtained from the London School of Hygiene and Tropical  
11 Medicine Ethics Committee (Ref 10334), Makerere University School of Public  
12 Health Higher Degrees Research and Ethics Committee (Ref 353), Infectious  
13 Diseases Scientific Review Committee and the Uganda National Council for Science  
14 and Technology (Ref 3998). Patients give informed consent at the time of  
15 registration in HIV care at the clinics, to be traced in case they miss their  
16 appointments. Patients who were traced successfully gave additional written or oral  
17 (phone interviews) informed consent for participation in the current study.  
18  
19  
20  
21  
22  
23

## 24 **RESULTS** 25

26  
27 Between the period of January to August 2015, 1153 individuals had registered in  
28 pre-ART care at the 6 clinics: 925 (80.2%) at the urban clinics and 228 (19.8%) at  
29 the rural clinics. 307 (26.6%) individuals were classified as lost from care (Table 1);  
30 207 from the urban clinics (22.4% of urban patients) and 100 from the rural clinics  
31 (43.9% of rural patients). A random sample of 195 (63.5% of those lost) patients was  
32 selected for tracing (116 from the urban clinics and 79 from the rural clinics) and 118  
33 (60.5%) were successfully traced. 70 patients had face-to-face interviews in the  
34 clinics, 20 had telephone interviews, and 28 had home visits.  
35  
36  
37  
38  
39  
40

41 The median (IQR) age of all patients who registered in pre-ART care was 29 (24–35)  
42 years; the majority (68.2%) were females, and the median (IQR) CD4 count was 645  
43 (529–834) cells/uL. CD4 counts were missing for 15% of patients (10% of those still  
44 in care and 27% of those who were lost); all missing data was from the rural clinics.  
45 Characteristics of patients who were still in care were generally similar to those who  
46 were lost but there was some evidence that those who were lost were most likely to  
47 be from rural clinics and to have higher CD4 counts (Table 1). Among the 195  
48 patients who were selected for tracing, there was no evidence of a difference in the  
49 characteristics between those who were successfully traced and those who were not  
50 found. Of those who were successfully traced, 40 (33.9%) were found to be actively  
51  
52  
53  
54  
55  
56  
57  
58  
59  
60

1  
2  
3 in care (i.e. had re-registered at another clinic and were keeping up with their clinic  
4 appointments) and 71 (60.2%) were out of care. 7 (5.9%) individuals were found to  
5 have died after having left care.  
6  
7

8  
9 At 9 months, the cumulative incidence of loss from care based on the clinic registers  
10 was 30.2% (95% confidence interval (CI)=27.3%–33.5%; Figure 1). After  
11 incorporating outcomes from those who were successfully traced, loss from care  
12 reduced to 18.5% (95%CI 13.8%–23.6%). From the sensitivity analysis, assuming  
13 that the individuals who were traced but not found were all in care then loss was  
14 14.9% (95%CI=10.8%–19.6%). Assuming that these patients were all out of care,  
15 then loss from care increased to 38.5% (95%CI= 31.5%–45.7%). Loss from care  
16 was higher in rural than urban clinics (46.1% vs 25.8%, respectively, based on the  
17 clinic registers). When corrected for the outcomes of those who were traced, loss  
18 from care was 28.8% (95%CI=19.9%–37.5%) in the rural clinics and 15.3%  
19 (95%CI=9.9%–21.5%) in the urban clinics.  
20  
21  
22  
23  
24  
25  
26  
27

28  
29 Based on the information available from the clinic registers alone, no patients were  
30 known to have died. After tracing, 7 patients were found to have died. After  
31 incorporating the deaths that were found through tracing, the cumulative incidence of  
32 mortality at 9 months was estimated to be 1.6% (CI=0.5%–3.0%).  
33  
34  
35  
36  
37  
38  
39  
40  
41  
42  
43  
44  
45  
46  
47  
48  
49  
50  
51  
52  
53  
54  
55  
56  
57  
58  
59  
60

**Table 1. Characteristics of patients registered for pre-ART care**

| Characteristics | In care<br>(N=864)<br>N (col %) | Lost<br>(N=307)<br>N (col %) | p-value <sup>a</sup> | Tracked<br>(N=195)<br>N (col %) | Not tracked<br>(N=112)<br>N (col %) | p-value <sup>b</sup> | Found<br>(N=118)<br>N (col %) | Not found<br>(N=77)<br>N (col %) | p-value <sup>c</sup> |
|-----------------|---------------------------------|------------------------------|----------------------|---------------------------------|-------------------------------------|----------------------|-------------------------------|----------------------------------|----------------------|
| Sex             |                                 |                              | 0.17                 |                                 |                                     | 0.97                 |                               |                                  | 0.84                 |
| Male            | 258 (30.5%)                     | 109 (35.5%)                  |                      | 69 (35.4%)                      | 72 (64.3%)                          |                      | 41 (34.7%)                    | 28 (36.4%)                       |                      |
| Female          | 588 (69.5%)                     | 198 (64.5%)                  |                      | 126 (64.6%)                     | 40 (35.7%)                          |                      | 77 (65.3%)                    | 49 (63.6%)                       |                      |
| Location        |                                 |                              | 0.02                 |                                 |                                     | 0.13                 |                               |                                  | 0.38                 |
| Urban sites     | 718 (84.9%)                     | 207 (67.4%)                  |                      | 116 (59.5%)                     | 91 (81.3%)                          |                      | 66 (55.9%)                    | 50 (64.9%)                       |                      |
| Rural sites     | 128 (15.1%)                     | 100 (32.6%)                  |                      | 79 (40.5%)                      | 21 (18.8%)                          |                      | 52 (44.1%)                    | 27 (35.1%)                       |                      |
| Age in years    |                                 |                              | 0.15                 |                                 |                                     | 0.25                 |                               |                                  | 0.44                 |
| <20             | 27 (3.2 %)                      | 18 (5.9 %)                   |                      | 14 (7.3 %)                      | 4 (3.6%)                            |                      | 10 (8.7 %)                    | 4 (5.3 %)                        |                      |
| 20-29           | 415 (49.2%)                     | 158 (52.1%)                  |                      | 96 (50.3%)                      | 62 (55.4%)                          |                      | 53 (46.1%)                    | 43 (56.6%)                       |                      |
| 30-39           | 266 (31.6%)                     | 86 (28.4%)                   |                      | 58 (30.4%)                      | 28 (25%)                            |                      | 35 (30.4%)                    | 23 (30.3%)                       |                      |
| 40-49           | 91 (10.8%)                      | 35 (11.6%)                   |                      | 22 (11.5%)                      | 13 (11.6%)                          |                      | 16 (13.9%)                    | 6 (7.9 %)                        |                      |
| 50+             | 44 (5.2 %)                      | 6 (2.0 %)                    |                      | 1 (0.5 %)                       | 5 (4.5%)                            |                      | 1 (0.9 %)                     | 0 (0.0 %)                        |                      |
| Missing         | 3                               | 4                            |                      | 4                               | 0                                   |                      | 3                             | 1                                |                      |
| CD4 count cell  |                                 |                              | 0.08                 |                                 |                                     | 0.07                 |                               |                                  | 0.27                 |
| 350-499         | 137 (18.0%)                     | 35 (15.6%)                   |                      | 21 (16.5%)                      | 14 (14.4%)                          |                      | 13 (17.8%)                    | 8 (14.8%)                        |                      |
| 500-749         | 376 (49.4%)                     | 100 (44.6%)                  |                      | 53 (41.7%)                      | 47 (48.5%)                          |                      | 34 (46.6%)                    | 19 (35.2%)                       |                      |
| 750+            | 248 (32.6%)                     | 89 (39.7%)                   |                      | 53 (41.7%)                      | 36 (37.1%)                          |                      | 26 (35.6%)                    | 27 (50.0%)                       |                      |
| Median (IQR)    | 644 (525–812)                   | 654 (540–892)                |                      | 659 (553–918)                   | 648 (534–862)                       |                      | 640 (553–885)                 | 734 (565–946)                    |                      |
| Missing         | 85                              | 83                           |                      | 68                              | 15                                  |                      | 45                            | 23                               |                      |
| Weight (kg)     |                                 |                              | 0.27                 |                                 |                                     | 0.53                 |                               |                                  | 0.10                 |
| <50             | 98 (12.5%)                      | 36 (15.4%)                   |                      | 19 (14.0%)                      | 17 (17.3%)                          |                      | 9 (11.4%)                     | 10 (17.5%)                       |                      |
| 50- <60         | 285 (36.5%)                     | 87 (37.2%)                   |                      | 48 (35.3%)                      | 39 (39.8%)                          |                      | 28 (35.4%)                    | 20 (35.1%)                       |                      |
| 60- <70         | 235 (30.0%)                     | 76 (32.5%)                   |                      | 45 (33.1%)                      | 31 (31.6%)                          |                      | 22 (27.8%)                    | 23 (40.4%)                       |                      |
| 70+             | 164 (21.0%)                     | 35 (15.0%)                   |                      | 24 (17.6%)                      | 11 (11.2%)                          |                      | 20 (25.3%)                    | 4 (7.0%)                         |                      |
| Median (IQR)    | 60 (52–66)                      | 59 (52–65)                   |                      | 60 (52–65.5)                    | 58 (52–65)                          |                      | 60 (53–70)                    | 59 (51–62)                       |                      |

1  
2  
3  
4  
5  
6  
7  
8  
9  
10  
11  
12  
13  
14  
15  
16  
17  
18  
19  
20  
21  
22  
23  
24  
25  
26  
27  
28  
29  
30  
31  
32  
33  
34  
35  
36  
37  
38  
39  
40  
41  
42  
43  
44  
45  
46  
47

|         |    |    |    |    |    |    |
|---------|----|----|----|----|----|----|
| Missing | 64 | 73 | 59 | 14 | 39 | 20 |
|---------|----|----|----|----|----|----|

<sup>a</sup> p value comparing those in care and lost, using Rao-Scott correction to chi squared test to account for clustered sampling. Individuals with missing values excluded from comparison. <sup>b</sup> p value comparing those selected for tracing and not selected, calculated as described in footnote a. <sup>c</sup> p value comparing those successfully traced and those not found, calculated as described in footnote a

For peer review only



In both the uncorrected and corrected analysis of factors associated with loss from care, there was strong evidence that patients from rural clinics were more likely to be lost from care than those from urban clinics (adjusted(a)HR (uncorrected)=1.95, 95%CI = 1.68–2.27, p<0.001; aHR(corrected) =2.02, 95%CI=1.49–2.73, p<0.001; Table 2). There was some evidence that older patients were less likely to be lost from care than younger patients (aHR (uncorrected) =0.79 for each 10-year increase in age, 95%CI= 0.66–0.94, p=0.007; aHR(corrected)= 0.71; 95%CI= 0.54–0.93, p=0.01). In the corrected analysis, but not in the uncorrected, there was also weak evidence that males were more likely to be lost from care.

**Table 2. Factors associated with loss from care, estimated from Cox proportional hazards models, based on data in clinic registers (uncorrected) and corrected for the outcomes among patients who were successfully traced**

| Characteristics               | Uncorrected HR <sup>1</sup><br>(95% CI) | P value | Corrected HR <sup>1</sup><br>(95% CI) | P value |
|-------------------------------|-----------------------------------------|---------|---------------------------------------|---------|
| <b>Sociodemographic</b>       |                                         |         |                                       |         |
| Sex                           |                                         | 0.38    |                                       | 0.07    |
| Female                        | 1                                       |         |                                       |         |
| Male                          | 1.17(0.82, 1.68)                        |         | 1.39(0.97,1.99)                       |         |
| Age per 10 years              |                                         | 0.007   |                                       | 0.01    |
|                               | 0.79(0.66, 0.94)                        |         | 0.71(0.54,0.93)                       |         |
| Location                      |                                         | <0.001  |                                       | <0.001  |
| Urban                         | 1                                       |         | 1                                     |         |
| Rural                         | 1.95(1.68, 2.27)                        |         | 2.02(1.49, 2.73)                      |         |
| <b>Clinical<sup>2</sup></b>   |                                         |         |                                       |         |
| CD4 count (per 100 cells)     |                                         | 0.22    |                                       | 0.41    |
|                               | 1.04(0.98, 1.10)                        |         | 1.05(0.93,1.20)                       |         |
| Weight per 10kgs <sup>3</sup> |                                         | <0.001  |                                       | <0.001  |
| Linear term                   | 0.94(0.80, 1.11)                        |         | 1.03(0.74, 1.42)                      |         |
| Quadratic term                | 1.03(1.02, 1.04)                        |         | 0.94(0.90, 0.98)                      |         |

<sup>1</sup>Sociodemographic variables adjusted for all sociodemographic variables in the table. Clinical variables adjusted for all variables in the table. <sup>2</sup>Analysis of associations with clinical variables restricted to urban patients. <sup>3</sup>Weight is scaled (divided by 10) and centred on mean weight in the analysis.

Among patients from the urban clinics, in the uncorrected analysis, weight at registration was the only clinical characteristic associated with loss from care. Loss from care decreased with increasing weight to around 60 kilograms (kg), and then increased. After incorporating outcomes from the successfully tracked patients, weight at registration was still associated with loss from care, but the direction of the association had changed, with the risk of loss from care increasing slightly with increasing weight to around 60 kg, and then decreasing (Table 2).

Among the 71 patients who were successfully tracked and found not to be seeking care elsewhere, the main reasons for stopping care were that they lacked money for transport (37%), that they did not feel unwell (27%) or that they had moved to places without an HIV care facility (27%) (Table 3). Patients also reported that they lacked time (15%), purchased cotrimoxazole from other sources (14%) or did not believe that they were HIV positive (11%). The main reasons for stopping care among urban patients was not feeling unwell (41%) or having moved (39%). Among rural patients, the main reasons were lack of money for transport (50%) or that the clinic was too far away (43%)

**Table 3. Reported reasons for leaving care or changing clinics among 111 patients who were traced and found alive**

| Reason for no longer attending clinic | No longer in care         |              |            |
|---------------------------------------|---------------------------|--------------|------------|
|                                       | Urban (N=41)              | Rural (N=30) | All (N=71) |
| Lack money for transport              | 11 (26.8%)                | 15 (50.0%)   | 26 (36.6%) |
| Does not feel sick                    | 17 (41.5%)                | 2 (6.7%)     | 19 (26.8%) |
| Travelled/ moved away                 | 16 (39.0%)                | 3 (10.0%)    | 19 (26.8%) |
| Health centre is far away             | 5 (12.2%)                 | 13 (43.3%)   | 18 (25.4%) |
| Lack time                             | 8 (19.5%)                 | 3 (10.0%)    | 11 (15.5%) |
| Gets cotrimoxazole from other sources | 7 (17.1%)                 | 3 (10.0%)    | 10 (14.1%) |
| Doubts HIV status                     | 4 (9.8%)                  | 4 (13.3%)    | 8 (11.3%)  |
| Fear of being seen at the HIV clinic  | 0 (0.0%)                  | 5 (16.7%)    | 5 (7.0%)   |
| Does not like drugs/side effects      | 4 (9.8%)                  | 1 (3.3%)     | 5 (7.0%)   |
| Using herbal/traditional medicines    | 0 (0.0%)                  | 3 (10.0%)    | 3 (4.2%)   |
| Other reason                          | 3 (7.3%)                  | 2 (6.7%)     | 5 (7.0%)   |
| Reason for changing clinics           | In care at another clinic |              |            |
|                                       | Urban (N=23)              | Rural (N=17) | All (N=40) |
| Closer to work                        | 12 (52.2%)                | 6 (35.3%)    | 18 (45.0%) |
| Lack of money for transport           | 6 (26.1%)                 | 4 (23.5%)    | 10 (25.0%) |
| Less waiting time                     | 7 (30.4%)                 | 0 (0.0%)     | 7 (17.5%)  |
| Lack time                             | 5 (21.7%)                 | 1 (5.9%)     | 5 (12.5%)  |

|                                        |           |           |           |
|----------------------------------------|-----------|-----------|-----------|
| Friends/family attend                  | 3 (13.0%) | 0 (0.0 %) | 3 (7.5 %) |
| Fear of being seen at the first clinic | 3 (13.0%) | 1 (5.9 %) | 3 (7.5 %) |
| Better service                         | 1 (4.3 %) | 1 (5.9 %) | 2 (5.0 %) |
| Other reason                           | 1 (4.3 %) | 4 (23.5%) | 5 (12.5%) |

Among the 40 patients who reported being in care at another clinic, the main reasons for changing clinics was that the new clinic was closer to work or home (45%), they lacked money for transport (25%) or the new clinics had less waiting time (17%). The new clinic being closer was cited as the main reason for changing for both urban and rural patients (52% and 35%, respectively).

## DISCUSSION

Much of the research that has been done regarding correction of estimates of retention in HIV care has concentrated on HIV positive individuals on ART. This study looked at individuals who had recently received an HIV diagnosis but were not yet eligible for ART. Based on the information from the clinic registers alone, loss from care was nearly 65% higher than after correcting for outcomes among individuals who were traced. We found that a third of the patients who were considered lost were continuing to access care at another clinic (silent transfers). We also identified deaths that had not been reported to the clinic. Other studies that have used a sampling based approach to correct estimates of retention among HIV positive individuals on ART have had similar findings.[12,16,17]

A study among HIV positive people in pre-ART care at two large clinics in Uganda in 2008–2011 found that loss from care after 2.5 years was 30.5% but decreased to 11.8% after correcting for outcomes in a sample of lost patients.[18] These figures are much lower than we found in our study in 2015, particularly in the rural clinics where corrected estimates of loss from care after 9 months were still 28.8%. The tracing period in our study was shorter and our definition of loss from care was more restrictive (3 months late to appointment vs 6 months late). Furthermore, some of the clinics in our study were smaller and more rural, so factors such as lack of transport or distance to the clinic may have presented greater barriers to retention. In the rural

1  
2  
3 areas, patients often have to travel more than 10km on foot or bicycle to get to the  
4 clinics. Lastly, the CD4 threshold for ART eligibility in the earlier study was  $\leq 350$ , vs  
5  $\leq 500$  in 2015, so a larger proportion of patients in our study may have been  
6 asymptomatic and thus less motivated to remain in care.  
7  
8

9  
10  
11 Our estimates of retention, even after correction, are in line with previous studies in  
12 SSA that have shown poor retention among patients in pre-ART care. A recent  
13 review found a median of 53% of patients who had linked to pre-ART care were  
14 retained until the study endpoint.[19] Even among patients who have been identified  
15 as ART eligible, a not insignificant proportion may be lost before starting ART. A  
16 study of ART-eligible patients at a clinic in Uganda found 20% did not start ART  
17 within a year, with 8% dying whilst waiting to initiate ART.[11] Two separate reviews  
18 of retention in HIV care in SSA found that around a third of patients who were eligible  
19 for ART were lost before starting treatment.[5,20]. Factors associated with loss from  
20 care in this stage include facility-level barriers such as requirements for multiple  
21 clinic visits, inflexible clinic hours, lengthy waiting times and poor quality of care, and  
22 individual-level barriers such as fear of HIV disclosure, or limited understanding of  
23 HIV.[21]  
24  
25  
26  
27  
28  
29  
30  
31  
32

33  
34 With the new WHO 'treat all' guidelines, all individuals will be eligible to start ART  
35 immediately, but in practice there is likely to be a delay between linking to care after  
36 testing positive, and initiating treatment. Removing the CD4 eligibility threshold may  
37 increase the number of patients attending the clinics, which can put a strain on  
38 already overburdened health care systems. Many of the same barriers to ART  
39 initiation will remain under 'treat all' unless the process of starting ART is made more  
40 efficient. For successful implementation of the new guidelines, it will be essential to  
41 have accurate estimates of the proportion of people who disengage from care in the  
42 period before starting ART.  
43  
44  
45  
46  
47  
48  
49

50 In our study, most of the reported reasons for leaving care were economic (lack of  
51 money for transport, distance from the clinic) or health systems factors (moving to a  
52 location without an HIV care facility). These factors have been commonly cited in  
53 other studies, and are a challenge to providing lifelong HIV care in resource-limited  
54 settings. A systematic review of linkage to and retention in HIV care found that  
55  
56  
57  
58  
59  
60

1  
2  
3 transport costs and distance were two of the main barriers to retention in pre-ART  
4 care.[21] A considerable number of patients reported obtaining cotrimoxazole from  
5 other sources, presumably in response to the challenges they faced attending the  
6 clinic. Psychological factors such as feeling well, or not believing that one was HIV  
7 positive, were also cited as reasons for leaving care, especially among urban  
8 patients. As has been reported in other studies, we found that younger patients  
9 were more likely to be lost from care.[21] These findings suggest that a combination  
10 of interventions may be required to improve retention in care.  
11  
12  
13  
14  
15

16  
17 We used a pragmatic approach to correct our estimates of loss from care,  
18 arithmetically upweighting the outcomes of patients who were tracked successfully to  
19 represent those of patients who were lost. Other methods have been proposed for  
20 incorporating these outcomes, including using regression models to estimate the  
21 inverse probability weights, and multiple imputation in conjunction with the  
22 ascertained outcomes. Simulations have shown that these strategies all provide less  
23 biased results than the standard uncorrected approach that is used in many  
24 epidemiological studies.[22]  
25  
26  
27  
28  
29  
30

31  
32 Our study has several limitations. We traced only a sample of patients who were lost,  
33 and were able to find 61% of those who were selected for tracing. The individuals  
34 that we found may not have been representative of all patients who were lost.  
35 Although there was no evidence that the characteristics of those who were  
36 successfully traced were different from those who were not found, our small sample  
37 size means that we may not have had power to detect true differences if they  
38 existed, and possible bias in our estimates may still remain. In addition, our sample  
39 size was based on practical considerations, rather than the power to detect a  
40 particular effect size. In addition, we looked at loss from care over a fairly short  
41 period (9 months); it is possible that some of the individuals defined as lost based on  
42 the clinic registers would have returned to the clinic at a later date. For the  
43 individuals who were successfully traced, we relied on self-report to define whether  
44 an individual was still in care at another clinic, which may have led to over-reporting  
45 of care. Our analysis of factors associated with loss from care was limited by the  
46 small number of covariates and the large amount of missing data in the clinic  
47 databases particularly from the rural areas. Our findings from government clinics in  
48  
49  
50  
51  
52  
53  
54  
55  
56  
57  
58  
59  
60

1  
2  
3 Uganda may not be generalisable across all HIV treatment programmes in SSA,  
4 where reasons for disengagement from care, and outcomes after disengagement,  
5 may differ.  
6  
7  
8

9 In summary, we found that estimates of loss from pre-ART care using a sampling  
10 based approach were substantially lower than those based on the clinic registers  
11 alone. Retention was much lower in rural clinics than in urban clinics and was in line  
12 with previous reports of pre-ART retention in SSA. Structural factors were a key  
13 barrier to retention. These findings may have implications for the successful  
14 implementation of the 'treat all' guidelines, and retention in care among individuals  
15 with high CD4 counts in similar resource-limited settings.  
16  
17  
18  
19  
20  
21  
22  
23  
24  
25  
26  
27  
28  
29  
30  
31  
32  
33  
34  
35  
36  
37  
38  
39  
40  
41  
42  
43  
44  
45  
46  
47  
48  
49  
50  
51  
52  
53  
54  
55  
56  
57  
58  
59  
60

## Acknowledgements

We acknowledge the Kampala City Council Authority clinic staff and officials, the Infectious Disease Institute Outreach team, and the HIV care centres in Hoima and Kabaale (Dwoli health centre III, Kigoroby health centre IV and Kagadi hospital) for their support and collaboration. We thank the study participants for their participation and the project staff for their work. We acknowledge the assistance of the Statistics unit at the Infectious Disease Institute.

## Competing interests

All authors have completed the ICMJE uniform disclosure form at [www.icmje.org/coi\\_disclosure.pdf](http://www.icmje.org/coi_disclosure.pdf) and declare: PN and JB had research grant support from EDCTP for the submitted work; KB and JB receive research grants from MRC UK and DFID; no financial relationships with any organisations that might have an interest in the submitted work in the previous three years; no other relationships or activities that could appear to have influenced the submitted work.

## Funding

This work was supported by the European & Developing Countries Clinical Trials Partnership (EDCTP) through project MF.2013.40205.020; however, EDCTP cannot accept any responsibility for information or views expressed herein. JB and KB receive support from the MRC UK and DFID (MRC grant number G0700837).

## Author contribution

PN, ANK, JB and KB conceived and designed the study. PN, ANK and AK conducted the study. PN analysed the data and developed the first draft. ANK, JB and KB advised on data analysis. All authors contributed to the interpretation of the data, revised the article critically and approved the final version.

1  
2  
3  
4  
5  
6  
7  
8  
9  
10  
11  
12  
13  
14  
15  
16  
17  
18  
19  
20  
21  
22  
23  
24  
25  
26  
27  
28  
29  
30  
31  
32  
33  
34  
35  
36  
37  
38  
39  
40  
41  
42  
43  
44  
45  
46  
47  
48  
49  
50  
51  
52  
53  
54  
55  
56  
57  
58  
59  
60

**Data sharing statement**

The original data can only be accessed by the research investigators at the Infectious Disease Institute. PN can be contacted if anonymised data or the statistical code are required

For peer review only



## REFERENCES

1. World Health Organization. Progress report 2016: prevent HIV, test and treat all: WHO support for country impact. Geneva, Switzerland; 2016.
2. Stover J, Bollinger L, Izazola JA, et al., What is required to end the AIDS epidemic as a public health threat by 2030? The cost and impact of the fast-track approach. *PLoS ONE* 2016;11(5):e0154893.
3. UNAIDS. 90-90-90 An ambitious treatment target to help end the AIDS epidemic. Geneva, Switzerland 2014. Available from <http://www.unaids.org/en/resources/documents/2017/90-90-90>.
4. Kisesa A, Chamla D. Getting to 90–90–90 targets for children and adolescents HIV in low and concentrated epidemics: bottlenecks, opportunities, and solutions. *Curr Opin HIV AIDS* 2016;11(Suppl1):S1.
5. Kranzer K, Govindasamy D, Ford N, et al. Quantifying and addressing losses along the continuum of care for people living with HIV infection in sub-Saharan Africa: a systematic review. *J Int AIDS Soc* 2012;15(2):17383
6. World Health Organization. Consolidated guidelines on the use of antiretroviral drugs for treating and preventing HIV infection. Recommendations for a public health approach. Second edition. Geneva, Switzerland; 2016.
7. Uganda AIDS Commission. Presidential Fast Track Initiative on Ending HIV and AIDS in Uganda. June 2017. <http://www.aidsuganda.org/images/documents/PresidentialHandbook.pdf>
8. Fox M, Rosen A. new cascade of HIV care for the era of 'treat all'. *PLoS Medicine* 2017;14(4):e1002268.
9. Geng EH, Glidden DV, Bwana MB, et al. Retention in care and connection to care among HIV-infected patients on antiretroviral therapy in Africa: estimation via a sampling-based approach. *PLoS ONE* 2011;6(7):e21797.
10. Tweya H, Feldacker C, Estill J, et al. Are they really lost? 'True' status and reasons for treatment discontinuation among HIV infected patients on antiretroviral therapy considered lost to follow up in urban Malawi. *PLoS ONE* 2013;8(9):e75761.
11. Geng EH, Bwana MB, Muyindike W, et al. Failure to initiate antiretroviral therapy, loss to follow-up and mortality among HIV-infected patients during

- 1  
2  
3 the pre-ART period in Uganda. *J Acquir Immune Defic Syndr* 2013;63(2):e64-  
4 71.  
5  
6 12. Geng EH, Glidden DV, Emenyonu N, et al. Tracking a sample of patients lost  
7 to follow-up has a major impact on understanding determinants of survival in  
8 HIV-infected patients on antiretroviral therapy in Africa. *Trop Med Int Health*,  
9 2010;15(Suppl1):63-69.  
10  
11 13. Geng EH, Emenyonu N, Bwana MB, et al. Sampling-based approach to  
12 determining outcomes of patients lost to follow-up in antiretroviral therapy  
13 scale-up programs in Africa. *JAMA* 2008;300(5):506-507.  
14  
15 14. Geng EH, Odeny TA, Lyamuya R, et al. Retention in care and patient-  
16 reported reasons for undocumented transfer or stopping care among HIV-  
17 infected patients on antiretroviral therapy in Eastern Africa: application of a  
18 sampling-based approach. *Clin Infect Dis* 2015:civ1004.  
19  
20 15. Infectious Disease Institute College of Health Sciences Makerere University  
21 Annual Report; 2015. [https://www.idi-makerere.com/index.php?option=  
22 com\\_docman&view=docman&Itemid=565](https://www.idi-makerere.com/index.php?option=com_docman&view=docman&Itemid=565).  
23  
24 16. Kiragga AN, Castelnovo B, Musomba R, et al. Comparison of methods for  
25 correction of mortality estimates for loss to follow-up after ART initiation: a  
26 case of the Infectious Diseases Institute, Uganda. *PLoS ONE*  
27 2013;8(12):e83524.  
28  
29 17. Egger M, Spycher BD, Sidle J, et al. Correcting mortality for loss to follow-up:  
30 a nomogram applied to antiretroviral treatment programmes in sub-Saharan  
31 Africa. *PLoS Med*, 2011;8(1):e1000390.  
32  
33 18. Namusoby J, Semitala FC, Amanyire G, et al. High retention in care among  
34 HIV-infected patients entering care with CD4 levels >350 cells/uL under  
35 routine program conditions in Uganda. *Clin Infect Dis* 2013;57(9):1343-1350.  
36  
37 19. Plazy M, Orne-Gliemann J, Dabis F, et al. Retention in care prior to  
38 antiretroviral treatment eligibility in sub-Saharan Africa: a systematic review of  
39 the literature. *BMJ Open* 2015;5(6):e006927.  
40  
41 20. Rosen S, Fox MP. Retention in HIV care between testing and treatment in  
42 sub-Saharan Africa: a systematic review. *PLoS Med* 2011;8(7):e1001056.  
43  
44 21. Govindasamy D, Ford N, Kranzer K. Risk factors, barriers and facilitators for  
45 linkage to antiretroviral therapy care: a systematic review. *AIDS*  
46 2012;26(16):2059-2067.  
47  
48  
49  
50  
51  
52  
53  
54  
55  
56  
57  
58  
59  
60

- 1  
2  
3 22. Schomaker M, Gsponer T, Estill J, et al. Non-ignorable loss to follow-up:  
4 correcting mortality estimates based on additional outcome ascertainment.  
5 *Stat Med* 2014;33(1):129-142.  
6  
7  
8  
9  
10  
11  
12  
13  
14  
15  
16  
17  
18  
19  
20  
21  
22  
23  
24  
25  
26  
27  
28  
29  
30  
31  
32  
33  
34  
35  
36  
37  
38  
39  
40  
41  
42  
43  
44  
45  
46  
47  
48  
49  
50  
51  
52  
53  
54  
55  
56  
57  
58  
59  
60

1  
2  
3  
4  
5  
6  
7  
8  
9  
10  
11  
12  
13  
14  
15  
16  
17  
18  
19  
20  
21  
22  
23  
24  
25  
26  
27  
28  
29  
30  
31  
32  
33  
34  
35  
36  
37  
38  
39  
40  
41  
42  
43  
44  
45  
46  
47  
48  
49  
50  
51  
52  
53  
54  
55  
56  
57  
58  
59  
60

**Figure 1: Uncorrected and corrected cumulative incidence of loss from care among patients with CD4 >500 registered for HIV care at 6 clinics**

For peer review only



Figure 1: Uncorrected and corrected cumulative incidence of loss from care among patients with CD4 >500 registered for HIV care at 6 clinics

78x57mm (300 x 300 DPI)

**STROBE 2007 (v4) checklist of items to be included in reports of observational studies in epidemiology\***  
**Checklist for cohort, case-control, and cross-sectional studies (combined)**

| Section/Topic             | Item # | Recommendation                                                                                                                                                                                                                                                                                                                                                                                                                                                         | Reported on page # |
|---------------------------|--------|------------------------------------------------------------------------------------------------------------------------------------------------------------------------------------------------------------------------------------------------------------------------------------------------------------------------------------------------------------------------------------------------------------------------------------------------------------------------|--------------------|
| Title and abstract        | 1      | (a) Indicate the study’s design with a commonly used term in the title or the abstract                                                                                                                                                                                                                                                                                                                                                                                 | 1                  |
|                           |        | (b) Provide in the abstract an informative and balanced summary of what was done and what was found                                                                                                                                                                                                                                                                                                                                                                    | 2                  |
| <b>Introduction</b>       |        |                                                                                                                                                                                                                                                                                                                                                                                                                                                                        |                    |
| Background/rationale      | 2      | Explain the scientific background and rationale for the investigation being reported                                                                                                                                                                                                                                                                                                                                                                                   | 4                  |
| Objectives                | 3      | State specific objectives, including any pre-specified hypotheses                                                                                                                                                                                                                                                                                                                                                                                                      | 5                  |
| <b>Methods</b>            |        |                                                                                                                                                                                                                                                                                                                                                                                                                                                                        |                    |
| Study design              | 4      | Present key elements of study design early in the paper                                                                                                                                                                                                                                                                                                                                                                                                                | 5, 6               |
| Setting                   | 5      | Describe the setting, locations, and relevant dates, including periods of recruitment, exposure, follow-up, and data collection                                                                                                                                                                                                                                                                                                                                        | 5, 6               |
| Participants              | 6      | (a) <i>Cohort study</i> —Give the eligibility criteria, and the sources and methods of selection of participants. Describe methods of follow-up<br><i>Case-control study</i> —Give the eligibility criteria, and the sources and methods of case ascertainment and control selection. Give the rationale for the choice of cases and controls<br><i>Cross-sectional study</i> —Give the eligibility criteria, and the sources and methods of selection of participants | 6,7                |
|                           |        | (b) <i>Cohort study</i> —For matched studies, give matching criteria and number of exposed and unexposed<br><i>Case-control study</i> —For matched studies, give matching criteria and the number of controls per case                                                                                                                                                                                                                                                 |                    |
| Variables                 | 7      | Clearly define all outcomes, exposures, predictors, potential confounders, and effect modifiers. Give diagnostic criteria, if applicable                                                                                                                                                                                                                                                                                                                               | 6-8                |
| Data sources/ measurement | 8*     | For each variable of interest, give sources of data and details of methods of assessment (measurement). Describe comparability of assessment methods if there is more than one group                                                                                                                                                                                                                                                                                   | 6, 7               |
| Bias                      | 9      | Describe any efforts to address potential sources of bias                                                                                                                                                                                                                                                                                                                                                                                                              | 7-8                |
| Study size                | 10     | Explain how the study size was arrived at                                                                                                                                                                                                                                                                                                                                                                                                                              | 6                  |
| Quantitative variables    | 11     | Explain how quantitative variables were handled in the analyses. If applicable, describe which groupings were chosen and why                                                                                                                                                                                                                                                                                                                                           | 7-8                |
| Statistical methods       | 12     | (a) Describe all statistical methods, including those used to control for confounding                                                                                                                                                                                                                                                                                                                                                                                  | 7-8                |
|                           |        | (b) Describe any methods used to examine subgroups and interactions                                                                                                                                                                                                                                                                                                                                                                                                    | 7-8                |
|                           |        | (c) Explain how missing data were addressed                                                                                                                                                                                                                                                                                                                                                                                                                            | 8                  |
|                           |        | (d) <i>Cohort study</i> —If applicable, explain how loss to follow-up was addressed<br><i>Case-control study</i> —If applicable, explain how matching of cases and controls was addressed                                                                                                                                                                                                                                                                              | 8                  |

|                          |     |                                                                                                                                                                                                              |           |
|--------------------------|-----|--------------------------------------------------------------------------------------------------------------------------------------------------------------------------------------------------------------|-----------|
|                          |     | <i>Cross-sectional study</i> —If applicable, describe analytical methods taking account of sampling strategy <sup>8</sup>                                                                                    |           |
|                          |     | (e) Describe any sensitivity analyses                                                                                                                                                                        | 8         |
| <b>Results</b>           |     |                                                                                                                                                                                                              |           |
| Participants             | 13* | (a) Report numbers of individuals at each stage of study—eg numbers potentially eligible, examined for eligibility, confirmed eligible, included in the study, completing follow-up, and analysed            | 8-9       |
|                          |     | (b) Give reasons for non-participation at each stage                                                                                                                                                         | 9         |
|                          |     | (c) Consider use of a flow diagram                                                                                                                                                                           | N/A       |
| Descriptive data         | 14* | (a) Give characteristics of study participants (eg demographic, clinical, social) and information on exposures and potential confounders                                                                     | 9         |
|                          |     | (b) Indicate number of participants with missing data for each variable of interest                                                                                                                          | 10        |
|                          |     | (c) <i>Cohort study</i> —Summarise follow-up time (eg, average and total amount)                                                                                                                             |           |
| Outcome data             | 15* | <i>Cohort study</i> —Report numbers of outcome events or summary measures over time                                                                                                                          | 9, 11     |
|                          |     | <i>Case-control study</i> —Report numbers in each exposure category, or summary measures of exposure                                                                                                         |           |
|                          |     | <i>Cross-sectional study</i> —Report numbers of outcome events or summary measures                                                                                                                           |           |
| Main results             | 16  | (a) Give unadjusted estimates and, if applicable, confounder-adjusted estimates and their precision (eg, 95% confidence interval). Make clear which confounders were adjusted for and why they were included | 9, 11, 12 |
|                          |     | (b) Report category boundaries when continuous variables were categorized                                                                                                                                    | N/A       |
|                          |     | (c) If relevant, consider translating estimates of relative risk into absolute risk for a meaningful time period                                                                                             | N/A       |
| Other analyses           | 17  | Report other analyses done—eg analyses of subgroups and interactions, and sensitivity analyses                                                                                                               | 9, 11     |
| <b>Discussion</b>        |     |                                                                                                                                                                                                              |           |
| Key results              | 18  | Summarise key results with reference to study objectives                                                                                                                                                     | 13        |
| Limitations              | 19  | Discuss limitations of the study, taking into account sources of potential bias or imprecision. Discuss both direction and magnitude of any potential bias                                                   | 15        |
| Interpretation           | 20  | Give a cautious overall interpretation of results considering objectives, limitations, multiplicity of analyses, results from similar studies, and other relevant evidence                                   | 15,16     |
| Generalisability         | 21  | Discuss the generalisability (external validity) of the study results                                                                                                                                        | 15        |
| <b>Other information</b> |     |                                                                                                                                                                                                              |           |
| Funding                  | 22  | Give the source of funding and the role of the funders for the present study and, if applicable, for the original study on which the present article is based                                                | 17        |

\*Give information separately for cases and controls in case-control studies and, if applicable, for exposed and unexposed groups in cohort and cross-sectional studies.

**Note:** An Explanation and Elaboration article discusses each checklist item and gives methodological background and published examples of transparent reporting. The STROBE checklist is best used in conjunction with this article (freely available on the Web sites of PLoS Medicine at <http://www.plosmedicine.org/>, Annals of Internal Medicine at <http://www.annals.org/>, and Epidemiology at <http://www.epidem.com/>). Information on the STROBE Initiative is available at [www.strobe-statement.org](http://www.strobe-statement.org).

# BMJ Open

## Correction of estimates of retention in care among a cohort of HIV-positive patients in Uganda in the period before starting ART: a sampling-based approach

|                                 |                                                                                                                                                                                                                                                                                                                                                                                                                                                                                                                                                                         |
|---------------------------------|-------------------------------------------------------------------------------------------------------------------------------------------------------------------------------------------------------------------------------------------------------------------------------------------------------------------------------------------------------------------------------------------------------------------------------------------------------------------------------------------------------------------------------------------------------------------------|
| Journal:                        | <i>BMJ Open</i>                                                                                                                                                                                                                                                                                                                                                                                                                                                                                                                                                         |
| Manuscript ID                   | bmjopen-2017-017487.R2                                                                                                                                                                                                                                                                                                                                                                                                                                                                                                                                                  |
| Article Type:                   | Research                                                                                                                                                                                                                                                                                                                                                                                                                                                                                                                                                                |
| Date Submitted by the Author:   | 17-Jan-2018                                                                                                                                                                                                                                                                                                                                                                                                                                                                                                                                                             |
| Complete List of Authors:       | Nyakato, Patience; London School of Hygiene and Tropical Medicine, Infectious Disease Epidemiology; Infectious Disease Institute, Makerere University<br>Kiragga, Agnes; Infectious Disease Institute, Makerere University<br>Kambugu, Andrew; Infectious Disease Institute, Makerere University<br>Bradley, John; London School of Hygiene and Tropical Medicine, MRC Tropical Epidemiology Group, Infectious Disease Epidemiology<br>Baisley, Kathy; London School of Hygiene and Tropical Medicine, MRC Tropical Epidemiology Group, Infectious Disease Epidemiology |
| <b>Primary Subject Heading</b>: | HIV/AIDS                                                                                                                                                                                                                                                                                                                                                                                                                                                                                                                                                                |
| Secondary Subject Heading:      | Epidemiology, HIV/AIDS, Global health, Health services research                                                                                                                                                                                                                                                                                                                                                                                                                                                                                                         |
| Keywords:                       | HIV & AIDS < INFECTIOUS DISEASES, Retention, Loss to follow up, CD4, pre-ART, Africa                                                                                                                                                                                                                                                                                                                                                                                                                                                                                    |
|                                 |                                                                                                                                                                                                                                                                                                                                                                                                                                                                                                                                                                         |

SCHOLARONE™  
Manuscripts



1  
2  
3 **Correction of estimates of retention in care among a cohort of HIV-positive**  
4 **patients in Uganda in the period before starting ART: a sampling-based**  
5 **approach**  
6  
7

8  
9 Patience Nyakato<sup>1,2</sup>, Agnes N Kiragga<sup>2</sup>, Andrew Kambugu<sup>2</sup>, John Bradley<sup>1\*</sup>, Kathy  
10 Baisley<sup>1\*</sup>  
11  
12

13  
14  
15 <sup>1</sup>MRC Tropical Epidemiology Group, Department of Infectious Disease  
16 Epidemiology, London School of Hygiene and Tropical Medicine, London, UK;

17  
18 <sup>2</sup>Infectious Diseases Institute, College of Health Sciences, Makerere University,  
19 Kampala, Uganda  
20  
21

22  
23 \*These authors are joint senior authors on this work.  
24  
25

26  
27  
28 **Corresponding author:** Patience Nyakato; Infectious Disease Institute, Mulago  
29 Hospital Complex, College of Health Sciences, Makerere University, PO Box 22418,  
30 Kampala, Uganda. Email: [panyakato2@gmail.com](mailto:panyakato2@gmail.com) Telephone: +256 787437316;  
31 Fax: +256 414 307290  
32  
33  
34  
35  
36  
37  
38  
39  
40  
41  
42  
43  
44  
45  
46  
47  
48  
49  
50  
51  
52  
53  
54  
55  
56  
57  
58  
59  
60

Word count: 4314

## ABSTRACT

**Objective:** The aim of this study was to use a sampling-based approach to obtain estimates of retention in HIV care before initiation of antiretroviral treatment (ART), corrected for outcomes in patients who were lost according to clinic registers.

**Design:** Retrospective cohort study of HIV positive individuals not yet eligible for ART (CD4 >500)

**Setting:** 3 urban and 3 rural HIV care clinics in Uganda; information was extracted from the clinic registers for all patients who had registered for pre-ART care between January–August 2015

**Participants:** A random sample of patients who were lost according to the clinic registers (>3 months late to scheduled visit) was traced to ascertain their outcomes.

**Outcome measures:** The proportion of patients lost from care was estimated using a competing risks approach, first based on the information in the clinic records alone and then using inverse probability weights to incorporate the results from tracing. Cox regression was used to determine factors associated with loss from care.

**Results:** Of 1153 patients registered for pre-ART care (68% female, median age 29 years, median CD4 count 645 cells/uL), 307 (27%) were lost according to clinic records. Among these, 195 (63%) were selected for tracing; outcomes were ascertained in 118 (61%). Seven patients (6%) had died, 40 (34%) were in care elsewhere, and 71 (60%) were out of care. Loss from care at 9 months was 30.2% (95% confidence interval (CI)=27.3%–33.5%). After incorporating outcomes from tracing, loss from care decreased to 18.5% (95%CI 13.8%–23.6%).

**Conclusion:** Estimates of loss from HIV care may be too high if based on routine clinic data alone. A sampling based approach is a feasible way of obtaining more accurate estimates of retention, accounting for transfers to other clinics.

**Key words:** HIV, retention in care, loss to follow up, pre-ART, CD4, Africa

## Article Summary

### Strengths and limitations of this study

- Most studies that use tracing to estimate retention in care focus on HIV-positive individuals on ART; this is one of few studies to apply these methods in the period before ART initiation.
- A sampling based approach is feasible and provides an opportunity to obtain more accurate estimates of retention in HIV care programmes in resource-limited settings
- Outcomes were not ascertained in all patients who were traced, so individuals who were traced successfully may not be representative of all who were lost.
- The follow-up time was relatively short, so some patients who were considered lost according to the clinic registers may have returned to the clinic at a later date.

## INTRODUCTION

Access to antiretroviral therapy (ART) has expanded considerably in sub-Saharan Africa (SSA), with 12 million people in the region receiving ART in 2016.[1] With the UNAIDS 90-90-90 targets (90% of HIV positive individuals know their status, 90% of those diagnosed are on ART and 90% of those on ART are virally suppressed by 2020), more HIV positive individuals are expected to be on ART and attain viral suppression.[2-4] However, although treatment coverage in SSA doubled between 2010 and 2015, estimated coverage was still only 47% in 2015, and HIV-related mortality remains high, partly due to loss from care.[1,2]

Major gaps in HIV treatment programmes include linking individuals who test HIV positive to care, and prompt initiation of ART. Previous WHO treatment guidelines were based on CD4 count thresholds, with pre-ART care focused on immunological monitoring until individuals became eligible for ART. A 2012 systematic review of retention in HIV care in SSA found a median of 57% of individuals returned for CD4 count results after testing HIV-positive, and among those who received their results, 45% remained in care until they became eligible for ART.[5] Even among those who were ART eligible, only a median of 66% initiated ART[5].

The WHO released new HIV treatment guidelines in 2015, recommending that ART be offered to all HIV positive individuals irrespective of CD4 count.[6] If widely implemented, the 'treat all' approach would contribute significantly to achieving the 90-90-90 goals. As of end 2016, many countries in SSA had begun implementing the new guidelines. However, several countries had introduced the guidelines only in selected treatment sites, and others had not yet adopted the new policy.[1] Scale-up of ART treatment for all HIV positive people in resource-limited settings will require broad health systems strengthening, which in practice may mean that, for budgetary or other practical reasons, some clinics may still use CD4 counts to prioritise starting treatment. Uganda officially rolled out the test and treat guidelines in November 2016. By end 2017, nearly all government clinics had implemented test and treat. However, in practice, priority for ART initiation is given to existing patients in pre-ART care. Furthermore, ART 'stock outs' are still common, so individuals who

1  
2  
3 are newly diagnosed are likely to have some period of pre-ART care. In March  
4 2017, an estimated 6% of HIV positive persons who were enrolled in HIV care were  
5 not on ART.[7] In addition, 48% of men who had tested HIV positive have not yet  
6 initiated ART.[7]  
7  
8  
9

10  
11 Under the 'treat all' guidelines, many individuals who are entering HIV care will have  
12 high CD4 counts and be asymptomatic, and therefore face different barriers to  
13 starting ART. Losses between testing HIV positive and ART initiation are still likely to  
14 remain. Obtaining accurate estimates of loss from care and outcomes in this stage  
15 will be important for evaluating the impact of the 'treat all' guidelines, and for  
16 designing interventions to improve retention and increase the numbers starting  
17 ART.[8]  
18  
19  
20  
21  
22  
23

24 Standard estimates of retention consider those who are lost to represent  
25 disengagement from care. However, many of those lost may include transfers to  
26 other care centres.[9,10] In rural Uganda, estimates of patient retention 3 years after  
27 initiating ART increased from 60% to 85% when corrected for outcomes among  
28 those who were lost.[9,11] Therefore, estimates of retention that consider patients  
29 who are lost from care to have disengaged from care are biased, and may result in  
30 misdirection of resources at the clinic and national levels.  
31  
32  
33  
34  
35  
36

37 We used a sampling-based approach to obtain more accurate estimates of loss from  
38 pre-ART care among HIV positive individuals attending clinics in Uganda who were  
39 not yet eligible for ART. This approach involves tracing a sample of lost patients and  
40 using a weighted analysis to correct the estimates of retention in the entire clinic  
41 population, with the assumption that the traced patients are representative of all who  
42 were lost.[12-14] We also explore the effect of this approach on estimates of  
43 mortality, and factors associated with loss from care before ART initiation.  
44  
45  
46  
47  
48  
49  
50  
51  
52  
53  
54  
55  
56  
57  
58  
59  
60

## METHODS

### Study setting

This was a retrospective cohort study of patients who had registered in pre-ART HIV care at 6 government clinics in Uganda: 3 urban Kampala city municipal clinics (Kisenyi, Kawala and Kitebi) which are managed by the Kampala City Council Authority (KCCA), and 3 rural health centres in Hoima and Kibaale districts in western Uganda, which are run by the Uganda Ministry of Health. The 3 urban clinics are level IV health centres, which have a target catchment population of 100,000. Kisenyi is the largest of these, and serves a particularly economically impoverished area. The rural facilities included one level IV (Kiogorobya) and one level III (Dwoli) health centre in Hoima district, and Kagadi District Hospital in Kibaale district. Hoima district had an estimated population of 574,000 in the 2014 census, and Kibaale had an estimated population of 789,000.

All 6 facilities are supported by the Infectious Diseases Institute (IDI), Makerere University and offer integrated HIV testing and care facilities, provision of ART, and laboratory support. Most persons attend the HIV counselling and testing facilities as walk-ins. Individuals who test positive are referred for care within the clinic, or a preferred alternate facility, for immediate CD4 testing. Individuals are registered at the clinic at the time of initiating CD4 testing. They are then asked to return to the clinic within two weeks for their CD4 results. At the time of the study (2015), individuals who were not yet eligible for ART were enrolled in a general pre-ART HIV care programme, and visited the clinic every 3 months for routine clinic check-ups and cotrimoxazole prophylaxis. In 2015, the CD4 count threshold for ART initiation was  $\leq 500$  cells/uL; however, in practice, priority was given to individuals with CD4 counts  $< 350$ . The 3 Kampala clinics are among 7 KCCA clinics supported by IDI; in June 2015, there were 33,514 HIV positive persons receiving HIV care services in these facilities, of whom 87% were on ART[15]

### Study design

A list of all individuals who tested HIV positive between January-May 2015 (Kampala clinics) and January-August 2015 (rural clinics) and were not yet eligible for ART was

1  
2  
3 obtained from the routine clinic records. Socio-demographic and routine clinical data  
4 for patients attending the Kampala clinics was extracted using the electronic patient  
5 records system (OpenMRS). For patients attending the rural clinics, the information  
6 was manually extracted from the paper-based clinic records, and entered into an  
7 Access database. Patients were then classified as either i) still in care; ii) transferred  
8 out to another clinic; iii) died; or iv) lost to follow-up, based on the information  
9 available from the clinic records. Patients were counted as lost to follow-up if they  
10 were 3 or more months late for their last scheduled visit at the clinic, and not known  
11 to have transferred out or to have died.  
12  
13  
14  
15  
16  
17  
18

19 From the sampling frame of all patients who were classified as lost, a random  
20 sample was selected, separately for urban clinics and rural clinics, for intensive  
21 tracing. The size of the sample was based on practical considerations of how many  
22 patients could be traced at each clinic with available resources, rather than on formal  
23 sample size calculations.  
24  
25  
26  
27  
28

29 Tracing was done between November 2015–March 2016 in both the urban and rural  
30 clinics. Tracers attempted to contact patients through phone calls and home visits,  
31 using addresses and locator forms containing secondary phone numbers, areas of  
32 residence, and a map to the area of residence. For patients who could not be  
33 contacted through phone calls, home visits using locator forms were used; at least 3  
34 visit attempts were made before declaring the patient unreachable.  
35  
36  
37  
38  
39

40 Patients who were successfully traced were asked to provide information about their  
41 current HIV care status: whether they were registered elsewhere and were attending  
42 another clinic; whether they had started ART elsewhere; and reasons for  
43 withdrawing from HIV care if not attending any HIV care facility. Patient deaths were  
44 ascertained through an interview with a close informant.  
45  
46  
47  
48  
49

50 Individuals were considered to have disengaged from care if they had not registered  
51 at any other clinic and had not returned to the clinic where they were originally  
52 registered for more than 3 months after their last scheduled visit. Individuals who  
53 said they were purchasing cotrimoxazole directly from the pharmacy (i.e. not under  
54 clinician's care) or they obtained drugs through relatives/friends were also  
55  
56  
57  
58  
59  
60

1  
2  
3 considered to have disengaged from care. Individuals who reported to have  
4 registered at another clinic were asked the name of the other clinic, the date of their  
5 next appointment, and for evidence of registration such as a patient card with a  
6 current appointment date. Those who had a current patient card, or gave a valid  
7 name of an HIV care clinic with a current appointment date, were considered to be in  
8 care.  
9  
10  
11  
12  
13

14 Interviews were conducted by trained nurse counsellors, all of whom had previous  
15 research experience. Information was collected using a standard structured  
16 questionnaire. The nurse counsellors made the contact attempts by telephone, and  
17 traced urban patients at their homes if the information on the locator form was  
18 sufficient. Many of the rural patients could not be reached by telephone, and the  
19 information on the locator forms was inadequate. Therefore, in the rural clinics,  
20 'expert' patients from each clinic were paired with the nurse interviewers to help  
21 trace patients in the community. Expert patients also helped with tracing in the urban  
22 clinics, for patients who could not be found through the locator forms. Expert  
23 patients serve as community volunteers at the clinic, and offer support to fellow  
24 patients in HIV care. They are familiar with the surrounding community and are often  
25 called on by the clinic to help trace persons on ART who have missed their visits.  
26  
27  
28  
29  
30  
31  
32  
33  
34

### 35 **Statistical analysis**

36  
37  
38 Descriptive statistics (proportions, means, medians and interquartile ranges) were  
39 used to summarise baseline characteristics. Characteristics of patients who were  
40 retained in pre-ART care and those who were lost were tabulated and compared  
41 using Chi square tests, with the Rao-Scott correction to account for correlation within  
42 clinics. In addition, characteristics of patients who were selected for tracing and  
43 traced successfully were compared with those who were selected but could not be  
44 found.  
45  
46  
47  
48  
49

50  
51 First, using only the information available from the clinic records, the proportion of  
52 patients who were lost from pre-ART care was estimated using a cumulative  
53 incidence approach, where deaths known to the clinics were treated as a competing  
54 risk. Observation time began on the date of registration at the clinic (i.e. the date of  
55  
56  
57  
58  
59  
60



1  
2  
3 presenting for CD4 testing after HIV diagnosis) and ended at the earliest of the date  
4 of known transfer out, death, loss from care (defined as 3 months after last missed  
5 appointment) or review of the clinic records (for individuals who were still in care).  
6 Patients who initiated ART were censored on the date of ART initiation. Then, a  
7 corrected analysis was conducted using the same approach but incorporating the  
8 outcomes obtained from tracing. The outcomes of patients who were successfully  
9 traced were weighted using inverse probability weights, calculated as the inverse  
10 proportion of patients who were successfully traced among all patients who were  
11 lost. Patients who could not be found, or who were not selected for tracing, were  
12 given a weight of 0. Patients who were still in care according to the clinic registers  
13 were given a weight of 1. Weights were calculated separately for each clinic. For  
14 example, suppose that in a clinic with 100 patients of whom 30 were lost, 10 were  
15 successfully traced and 6 were found to be still in care, the weights for the patients  
16 who were traced would be  $30/10=3$ . The corrected estimate for the proportion in  
17 care would be calculated as:  $[70 \times 1 + 6 \text{ (found to be still in care)} \times 3] / [70 \times 1 + 6 \times$   
18  $3 + 4 \text{ (found to be out of care)} \times 3] = 88/100$ . For individuals who were traced and  
19 found to still be in care, observation time was considered to end at the date of  
20 interview. Individuals who were traced and found to be alive but not in care were  
21 considered to have been lost 3 months after their last missed appointment at the  
22 original clinic.  
23  
24  
25  
26  
27  
28  
29  
30  
31  
32  
33  
34  
35

36  
37 A sensitivity analysis was also done: first we assumed that all individuals who were  
38 traced and not found were alive and in care elsewhere; second, we assumed that all  
39 patients who were not found were alive but not in care. Confidence intervals for the  
40 weighted estimates were obtained through bootstrapping using percentiles of the  
41 bootstrap distribution with 2000 replications.  
42  
43  
44  
45

46  
47 Cox proportional hazards models were fitted to examine factors associated with loss  
48 from care, using data from the clinic registers alone and in a weighted analysis after  
49 incorporating results from tracing. Robust standard errors were used to account for  
50 correlation within clinics. Owing to the small number of covariates available, all  
51 variables were included in the final multivariate model. In the rural clinics, data on  
52 clinical covariates were often missing from the patient records; therefore, the  
53 analysis of clinical covariates was restricted to patients from the urban clinics. The  
54  
55  
56  
57  
58  
59  
60

1  
2  
3 appropriate functional forms of continuous covariates were explored using low order  
4 polynomials (quadratic and cubic forms). All analyses were done using STATA  
5 version 14.2 (Stata Corp, College Station, Texas).  
6  
7

## 8 9 **Ethics**

10  
11 Ethical approvals were obtained from the London School of Hygiene and Tropical  
12 Medicine Ethics Committee (Ref 10334), Makerere University School of Public  
13 Health Higher Degrees Research and Ethics Committee (Ref 353), Infectious  
14 Diseases Scientific Review Committee and the Uganda National Council for Science  
15 and Technology (Ref 3998). Patients give informed consent at the time of  
16 registration in HIV care at the clinics, to be traced in case they miss their  
17 appointments. Patients who were traced successfully gave additional written or oral  
18 (phone interviews) informed consent for participation in the current study.  
19  
20  
21  
22  
23  
24

## 25 26 **RESULTS**

27  
28 Between the period of January to August 2015, 1153 individuals had registered in  
29 pre-ART care at the 6 clinics: 925 (80.2%) at the urban clinics and 228 (19.8%) at  
30 the rural clinics. 307 (26.6%) individuals were classified as lost from care (Table 1);  
31 207 from the urban clinics (22.4% of urban patients) and 100 from the rural clinics  
32 (43.9% of rural patients). A random sample of 195 (63.5% of those lost) patients was  
33 selected for tracing (116 from the urban clinics and 79 from the rural clinics) and 118  
34 (60.5%) were successfully traced. 70 patients had face-to-face interviews in the  
35 clinics, 20 had telephone interviews, and 28 had home visits.  
36  
37  
38  
39  
40  
41

42  
43 The median (IQR) age of all patients who registered in pre-ART care was 29 (24–35)  
44 years; the majority (68.2%) were females, and the median (IQR) CD4 count was 645  
45 (529–834) cells/uL. CD4 counts were missing for 15% of patients (10% of those still  
46 in care and 27% of those who were lost); all missing data was from the rural clinics.  
47 Characteristics of patients who were still in care were generally similar to those who  
48 were lost but there was some evidence that those who were lost were most likely to  
49 be from rural clinics and to have higher CD4 counts (Table 1). Among the 195  
50 patients who were selected for tracing, there was no evidence of a difference in the  
51 characteristics between those who were successfully traced and those who were not  
52  
53  
54  
55  
56  
57  
58  
59  
60

1  
2  
3 found. Of those who were successfully traced, 40 (33.9%) were found to be actively  
4 in care (i.e. had re-registered at another clinic and were keeping up with their clinic  
5 appointments) and 71 (60.2%) were out of care. 7 (5.9%) individuals were found to  
6 have died after having left care.  
7  
8

9  
10  
11 At 9 months, the cumulative incidence of loss from care based on the clinic registers  
12 was 30.2% (95% confidence interval (CI)=27.3%–33.5%; Figure 1). After  
13 incorporating outcomes from those who were successfully traced, loss from care  
14 reduced to 18.5% (95%CI 13.8%–23.6%). From the sensitivity analysis, assuming  
15 that the individuals who were traced but not found were all in care then loss was  
16 14.9% (95%CI=10.8%–19.6%). Assuming that these patients were all out of care,  
17 then loss from care increased to 38.5% (95%CI= 31.5%–45.7%). Loss from care  
18 was higher in rural than urban clinics (46.1% vs 25.8%, respectively, based on the  
19 clinic registers). When corrected for the outcomes of those who were traced, loss  
20 from care was 28.8% (95%CI=19.9%–37.5%) in the rural clinics and 15.3%  
21 (95%CI=9.9%–21.5%) in the urban clinics.  
22  
23  
24  
25  
26  
27  
28  
29

30 Based on the information available from the clinic registers alone, no patients were  
31 known to have died. After tracing, 7 patients were found to have died. After  
32 incorporating the deaths that were found through tracing, the cumulative incidence of  
33 mortality at 9 months was estimated to be 1.6% (CI=0.5%–3.0%).  
34  
35  
36  
37  
38  
39  
40  
41  
42  
43  
44  
45  
46  
47  
48  
49  
50  
51  
52  
53  
54  
55  
56  
57  
58  
59  
60

**Table 1. Characteristics of patients registered for pre-ART care**

| Characteristics | In care<br>(N=864)<br>N (col %) | Lost<br>(N=307)<br>N (col %) | p-value <sup>a</sup> | Tracked<br>(N=195)<br>N (col %) | Not tracked<br>(N=112)<br>N (col %) | p-value <sup>b</sup> | Found<br>(N=118)<br>N (col %) | Not found<br>(N=77)<br>N (col %) | p-value <sup>c</sup> |
|-----------------|---------------------------------|------------------------------|----------------------|---------------------------------|-------------------------------------|----------------------|-------------------------------|----------------------------------|----------------------|
| Sex             |                                 |                              | 0.17                 |                                 |                                     | 0.97                 |                               |                                  | 0.84                 |
| Male            | 258 (30.5%)                     | 109 (35.5%)                  |                      | 69 (35.4%)                      | 72 (64.3%)                          |                      | 41 (34.7%)                    | 28 (36.4%)                       |                      |
| Female          | 588 (69.5%)                     | 198 (64.5%)                  |                      | 126 (64.6%)                     | 40 (35.7%)                          |                      | 77 (65.3%)                    | 49 (63.6%)                       |                      |
| Location        |                                 |                              | 0.02                 |                                 |                                     | 0.13                 |                               |                                  | 0.38                 |
| Urban sites     | 718 (84.9%)                     | 207 (67.4%)                  |                      | 116 (59.5%)                     | 91 (81.3%)                          |                      | 66 (55.9%)                    | 50 (64.9%)                       |                      |
| Rural sites     | 128 (15.1%)                     | 100 (32.6%)                  |                      | 79 (40.5%)                      | 21 (18.8%)                          |                      | 52 (44.1%)                    | 27 (35.1%)                       |                      |
| Age in years    |                                 |                              | 0.15                 |                                 |                                     | 0.25                 |                               |                                  | 0.44                 |
| <20             | 27 (3.2 %)                      | 18 (5.9 %)                   |                      | 14 (7.3 %)                      | 4 (3.6%)                            |                      | 10 (8.7 %)                    | 4 (5.3 %)                        |                      |
| 20-29           | 415 (49.2%)                     | 158 (52.1%)                  |                      | 96 (50.3%)                      | 62 (55.4%)                          |                      | 53 (46.1%)                    | 43 (56.6%)                       |                      |
| 30-39           | 266 (31.6%)                     | 86 (28.4%)                   |                      | 58 (30.4%)                      | 28 (25%)                            |                      | 35 (30.4%)                    | 23 (30.3%)                       |                      |
| 40-49           | 91 (10.8%)                      | 35 (11.6%)                   |                      | 22 (11.5%)                      | 13 (11.6%)                          |                      | 16 (13.9%)                    | 6 (7.9 %)                        |                      |
| 50+             | 44 (5.2 %)                      | 6 (2.0 %)                    |                      | 1 (0.5 %)                       | 5 (4.5%)                            |                      | 1 (0.9 %)                     | 0 (0.0 %)                        |                      |
| Missing         | 3                               | 4                            |                      | 4                               | 0                                   |                      | 3                             | 1                                |                      |
| CD4 count cell  |                                 |                              | 0.08                 |                                 |                                     | 0.07                 |                               |                                  | 0.27                 |
| 350-499         | 137 (18.0%)                     | 35 (15.6%)                   |                      | 21 (16.5%)                      | 14 (14.4%)                          |                      | 13 (17.8%)                    | 8 (14.8%)                        |                      |
| 500-749         | 376 (49.4%)                     | 100 (44.6%)                  |                      | 53 (41.7%)                      | 47 (48.5%)                          |                      | 34 (46.6%)                    | 19 (35.2%)                       |                      |
| 750+            | 248 (32.6%)                     | 89 (39.7%)                   |                      | 53 (41.7%)                      | 36 (37.1%)                          |                      | 26 (35.6%)                    | 27 (50.0%)                       |                      |
| Median (IQR)    | 644 (525–812)                   | 654 (540–892)                |                      | 659 (553–918)                   | 648 (534–862)                       |                      | 640 (553–885)                 | 734 (565–946)                    |                      |
| Missing         | 85                              | 83                           |                      | 68                              | 15                                  |                      | 45                            | 23                               |                      |
| Weight (kg)     |                                 |                              | 0.27                 |                                 |                                     | 0.53                 |                               |                                  | 0.10                 |
| <50             | 98 (12.5%)                      | 36 (15.4%)                   |                      | 19 (14.0%)                      | 17 (17.3%)                          |                      | 9 (11.4%)                     | 10 (17.5%)                       |                      |
| 50- <60         | 285 (36.5%)                     | 87 (37.2%)                   |                      | 48 (35.3%)                      | 39 (39.8%)                          |                      | 28 (35.4%)                    | 20 (35.1%)                       |                      |
| 60- <70         | 235 (30.0%)                     | 76 (32.5%)                   |                      | 45 (33.1%)                      | 31 (31.6%)                          |                      | 22 (27.8%)                    | 23 (40.4%)                       |                      |
| 70+             | 164 (21.0%)                     | 35 (15.0%)                   |                      | 24 (17.6%)                      | 11 (11.2%)                          |                      | 20 (25.3%)                    | 4 (7.0%)                         |                      |
| Median (IQR)    | 60 (52–66)                      | 59 (52–65)                   |                      | 60 (52–65.5)                    | 58 (52–65)                          |                      | 60 (53–70)                    | 59 (51–62)                       |                      |

1  
2  
3  
4  
5  
6  
7  
8  
9  
10  
11  
12  
13  
14  
15  
16  
17  
18  
19  
20  
21  
22  
23  
24  
25  
26  
27  
28  
29  
30  
31  
32  
33  
34  
35  
36  
37  
38  
39  
40  
41  
42  
43  
44  
45  
46  
47

|         |    |    |    |    |    |    |
|---------|----|----|----|----|----|----|
| Missing | 64 | 73 | 59 | 14 | 39 | 20 |
|---------|----|----|----|----|----|----|

<sup>a</sup> p value comparing those in care and lost, using Rao-Scott correction to chi squared test to account for clustered sampling. Individuals with missing values excluded from comparison. <sup>b</sup> p value comparing those selected for tracing and not selected, calculated as described in footnote a. <sup>c</sup> p value comparing those successfully traced and those not found, calculated as described in footnote a

For peer review only

In both the uncorrected and corrected analysis of factors associated with loss from care, there was strong evidence that patients from rural clinics were more likely to be lost from care than those from urban clinics (adjusted(a)HR (uncorrected)=1.95, 95%CI = 1.68–2.27, p<0.001; aHR(corrected) =2.02, 95%CI=1.49–2.73, p<0.001; Table 2). There was some evidence that older patients were less likely to be lost from care than younger patients (aHR (uncorrected) =0.79 for each 10-year increase in age, 95%CI= 0.66–0.94, p=0.007; aHR(corrected)= 0.71; 95%CI= 0.54–0.93, p=0.01). In the corrected analysis, but not in the uncorrected, there was also weak evidence that males were more likely to be lost from care.

**Table 2. Factors associated with loss from care, estimated from Cox proportional hazards models, based on data in clinic registers (uncorrected) and corrected for the outcomes among patients who were successfully traced**

| Characteristics               | Uncorrected HR <sup>1</sup><br>(95% CI) | P value | Corrected HR <sup>1</sup><br>(95% CI) | P value |
|-------------------------------|-----------------------------------------|---------|---------------------------------------|---------|
| <b>Sociodemographic</b>       |                                         |         |                                       |         |
| Sex                           |                                         | 0.38    |                                       | 0.07    |
| Female                        | 1                                       |         |                                       |         |
| Male                          | 1.17(0.82, 1.68)                        |         | 1.39(0.97,1.99)                       |         |
| Age per 10 years              |                                         | 0.007   |                                       | 0.01    |
|                               | 0.79(0.66, 0.94)                        |         | 0.71(0.54,0.93)                       |         |
| Location                      |                                         | <0.001  |                                       | <0.001  |
| Urban                         | 1                                       |         | 1                                     |         |
| Rural                         | 1.95(1.68, 2.27)                        |         | 2.02(1.49, 2.73)                      |         |
| <b>Clinical<sup>2</sup></b>   |                                         |         |                                       |         |
| CD4 count (per 100 cells)     |                                         | 0.22    |                                       | 0.41    |
|                               | 1.04(0.98, 1.10)                        |         | 1.05(0.93,1.20)                       |         |
| Weight per 10kgs <sup>3</sup> |                                         | <0.001  |                                       | <0.001  |
| Linear term                   | 0.94(0.80, 1.11)                        |         | 1.03(0.74, 1.42)                      |         |
| Quadratic term                | 1.03(1.02, 1.04)                        |         | 0.94(0.90, 0.98)                      |         |

<sup>1</sup>Sociodemographic variables adjusted for all sociodemographic variables in the table. Clinical variables adjusted for all variables in the table. <sup>2</sup>Analysis of associations with clinical variables restricted to urban patients. <sup>3</sup>Weight is scaled (divided by 10) and centred on mean weight in the analysis.

Among patients from the urban clinics, in the uncorrected analysis, weight at registration was the only clinical characteristic associated with loss from care. Loss from care decreased with increasing weight to around 60 kilograms (kg), and then increased. After incorporating outcomes from the successfully tracked patients, weight at registration was still associated with loss from care, but the direction of the association had changed, with the risk of loss from care increasing slightly with increasing weight to around 60 kg, and then decreasing (Table 2).

Among the 71 patients who were successfully tracked and found not to be seeking care elsewhere, the main reasons for stopping care were that they lacked money for transport (37%), that they did not feel unwell (27%) or that they had moved to places without an HIV care facility (27%) (Table 3). Patients also reported that they lacked time (15%), purchased cotrimoxazole from other sources (14%) or did not believe that they were HIV positive (11%). The main reasons for stopping care among urban patients was not feeling unwell (41%) or having moved (39%). Among rural patients, the main reasons were lack of money for transport (50%) or that the clinic was too far away (43%)

**Table 3. Reported reasons for leaving care or changing clinics among 111 patients who were traced and found alive**

| Reason for no longer attending clinic | No longer in care         |              |            |
|---------------------------------------|---------------------------|--------------|------------|
|                                       | Urban (N=41)              | Rural (N=30) | All (N=71) |
| Lack money for transport              | 11 (26.8%)                | 15 (50.0%)   | 26 (36.6%) |
| Does not feel sick                    | 17 (41.5%)                | 2 (6.7%)     | 19 (26.8%) |
| Travelled/ moved away                 | 16 (39.0%)                | 3 (10.0%)    | 19 (26.8%) |
| Health centre is far away             | 5 (12.2%)                 | 13 (43.3%)   | 18 (25.4%) |
| Lack time                             | 8 (19.5%)                 | 3 (10.0%)    | 11 (15.5%) |
| Gets cotrimoxazole from other sources | 7 (17.1%)                 | 3 (10.0%)    | 10 (14.1%) |
| Doubts HIV status                     | 4 (9.8%)                  | 4 (13.3%)    | 8 (11.3%)  |
| Fear of being seen at the HIV clinic  | 0 (0.0%)                  | 5 (16.7%)    | 5 (7.0%)   |
| Does not like drugs/side effects      | 4 (9.8%)                  | 1 (3.3%)     | 5 (7.0%)   |
| Using herbal/traditional medicines    | 0 (0.0%)                  | 3 (10.0%)    | 3 (4.2%)   |
| Other reason                          | 3 (7.3%)                  | 2 (6.7%)     | 5 (7.0%)   |
| Reason for changing clinics           | In care at another clinic |              |            |
|                                       | Urban (N=23)              | Rural (N=17) | All (N=40) |
| Closer to work                        | 12 (52.2%)                | 6 (35.3%)    | 18 (45.0%) |
| Lack of money for transport           | 6 (26.1%)                 | 4 (23.5%)    | 10 (25.0%) |
| Less waiting time                     | 7 (30.4%)                 | 0 (0.0%)     | 7 (17.5%)  |
| Lack time                             | 5 (21.7%)                 | 1 (5.9%)     | 5 (12.5%)  |

|                                        |           |           |           |
|----------------------------------------|-----------|-----------|-----------|
| Friends/family attend                  | 3 (13.0%) | 0 (0.0 %) | 3 (7.5 %) |
| Fear of being seen at the first clinic | 3 (13.0%) | 1 (5.9 %) | 3 (7.5 %) |
| Better service                         | 1 (4.3 %) | 1 (5.9 %) | 2 (5.0 %) |
| Other reason                           | 1 (4.3 %) | 4 (23.5%) | 5 (12.5%) |

Among the 40 patients who reported being in care at another clinic, the main reasons for changing clinics was that the new clinic was closer to work or home (45%), they lacked money for transport (25%) or the new clinics had less waiting time (17%). The new clinic being closer was cited as the main reason for changing for both urban and rural patients (52% and 35%, respectively).

## DISCUSSION

Much of the research that has been done regarding correction of estimates of retention in HIV care has concentrated on HIV positive individuals on ART. This study looked at individuals who had recently received an HIV diagnosis but were not yet eligible for ART. Based on the information from the clinic registers alone, loss from care was nearly 65% higher than after correcting for outcomes among individuals who were traced. We found that a third of the patients who were considered lost were continuing to access care at another clinic (silent transfers). We also identified deaths that had not been reported to the clinic. Other studies that have used a sampling based approach to correct estimates of retention among HIV positive individuals on ART have had similar findings.[12,16,17]

A study among HIV positive people in pre-ART care at two large clinics in Uganda in 2008–2011 found that loss from care after 2.5 years was 30.5% but decreased to 11.8% after correcting for outcomes in a sample of lost patients.[18] These figures are much lower than we found in our study in 2015, particularly in the rural clinics where corrected estimates of loss from care after 9 months were still 28.8%. The tracing period in our study was shorter and our definition of loss from care was more restrictive (3 months late to appointment vs 6 months late). Furthermore, some of the clinics in our study were smaller and more rural, so factors such as lack of transport or distance to the clinic may have presented greater barriers to retention. In the rural



1  
2  
3 areas, patients often have to travel more than 10km on foot or bicycle to get to the  
4 clinics. Lastly, the CD4 threshold for ART eligibility in the earlier study was  $\leq 350$ , vs  
5  $\leq 500$  in 2015, so a larger proportion of patients in our study may have been  
6 asymptomatic and thus less motivated to remain in care.  
7  
8

9  
10  
11 Our estimates of retention, even after correction, are in line with previous studies in  
12 SSA that have shown poor retention among patients in pre-ART care. A recent  
13 review found a median of 53% of patients who had linked to pre-ART care were  
14 retained until the study endpoint.[19] Even among patients who have been identified  
15 as ART eligible, a not insignificant proportion may be lost before starting ART. A  
16 study of ART-eligible patients at a clinic in Uganda found 20% did not start ART  
17 within a year, with 8% dying whilst waiting to initiate ART.[11] Two separate reviews  
18 of retention in HIV care in SSA found that around a third of patients who were eligible  
19 for ART were lost before starting treatment.[5,20]. Factors associated with loss from  
20 care in this stage include facility-level barriers such as requirements for multiple  
21 clinic visits, inflexible clinic hours, lengthy waiting times and poor quality of care, and  
22 individual-level barriers such as fear of HIV disclosure, or limited understanding of  
23 HIV.[21]  
24  
25  
26  
27  
28  
29  
30  
31  
32

33  
34 With the new WHO 'treat all' guidelines, all individuals will be eligible to start ART  
35 immediately, but in practice there is likely to be a delay between linking to care after  
36 testing positive, and initiating treatment. Removing the CD4 eligibility threshold may  
37 increase the number of patients attending the clinics, which can put a strain on  
38 already overburdened health care systems. Many of the same barriers to ART  
39 initiation will remain under 'treat all' unless the process of starting ART is made more  
40 efficient. For successful implementation of the new guidelines, it will be essential to  
41 have accurate estimates of the proportion of people who disengage from care in the  
42 period before starting ART.  
43  
44  
45  
46  
47  
48  
49

50 In our study, most of the reported reasons for leaving care were economic (lack of  
51 money for transport, distance from the clinic) or health systems factors (moving to a  
52 location without an HIV care facility). These factors have been commonly cited in  
53 other studies, and are a challenge to providing lifelong HIV care in resource-limited  
54 settings. A systematic review of linkage to and retention in HIV care found that  
55  
56  
57  
58  
59  
60

1  
2  
3 transport costs and distance were two of the main barriers to retention in pre-ART  
4 care.[21] A considerable number of patients reported obtaining cotrimoxazole from  
5 other sources, presumably in response to the challenges they faced attending the  
6 clinic. Psychological factors such as feeling well, or not believing that one was HIV  
7 positive, were also cited as reasons for leaving care, especially among urban  
8 patients. As has been reported in other studies, we found that younger patients  
9 were more likely to be lost from care.[21] These findings suggest that a combination  
10 of interventions may be required to improve retention in care.  
11  
12  
13  
14  
15

16  
17 We used a pragmatic approach to correct our estimates of loss from care,  
18 arithmetically upweighting the outcomes of patients who were tracked successfully to  
19 represent those of patients who were lost. Other methods have been proposed for  
20 incorporating these outcomes, including using regression models to estimate the  
21 inverse probability weights, and multiple imputation in conjunction with the  
22 ascertained outcomes. Simulations have shown that these strategies all provide less  
23 biased results than the standard uncorrected approach that is used in many  
24 epidemiological studies.[22]  
25  
26  
27  
28  
29  
30

31  
32 Our study has several limitations. We traced only a sample of patients who were lost,  
33 and were able to find 61% of those who were selected for tracing. The individuals  
34 that we found may not have been representative of all patients who were lost.  
35 Although there was no evidence that the characteristics of those who were  
36 successfully traced were different from those who were not found, our small sample  
37 size means that we may not have had power to detect true differences if they  
38 existed, and residual selection bias may still remain. In addition, our sample size  
39 was based on practical considerations, rather than the power to detect a particular  
40 effect size. Our analysis of predictors of loss from care was underpowered to detect  
41 anything except large effects, particularly in our analysis of clinical factors which was  
42 restricted to the urban clinics. Similarly, our estimates of retention in care, and of  
43 mortality, are less precise than they would have been with a larger sample.  
44 Furthermore, there were relatively few deaths so our sample size may not have been  
45 adequate to obtain an accurate estimate of mortality. We looked at loss from care  
46 over a fairly short period (9 months); it is possible that some of the individuals  
47 defined as lost based on the clinic registers would have returned to the clinic at a  
48  
49  
50  
51  
52  
53  
54  
55  
56  
57  
58  
59  
60

1  
2  
3 later date. For the individuals who were successfully traced, we relied on self-report  
4 to define whether an individual was still in care at another clinic, which may have led  
5 to over-reporting of care. Our analysis of factors associated with loss from care was  
6 limited by the small number of covariates and the large amount of missing data in the  
7 clinic databases particularly from the rural areas. Our findings from government  
8 clinics in Uganda may not be generalisable across all HIV treatment programmes in  
9 SSA, where reasons for disengagement from care, and outcomes after  
10 disengagement, may differ.  
11  
12  
13  
14  
15  
16

17 In summary, we found that estimates of loss from pre-ART care using a sampling  
18 based approach were substantially lower than those based on the clinic registers  
19 alone. Retention was much lower in rural clinics than in urban clinics and was in line  
20 with previous reports of pre-ART retention in SSA. Structural factors were a key  
21 barrier to retention. These findings may have implications for the successful  
22 implementation of the 'treat all' guidelines, and retention in care among individuals  
23 with high CD4 counts in similar resource-limited settings.  
24  
25  
26  
27  
28  
29  
30  
31  
32  
33  
34  
35  
36  
37  
38  
39  
40  
41  
42  
43  
44  
45  
46  
47  
48  
49  
50  
51  
52  
53  
54  
55  
56  
57  
58  
59  
60

## Acknowledgements

We acknowledge the Kampala City Council Authority clinic staff and officials, the Infectious Disease Institute Outreach team, and the HIV care centres in Hoima and Kabaale (Dwoli health centre III, Kigoroby health centre IV and Kagadi hospital) for their support and collaboration. We thank the study participants for their participation and the project staff for their work. We acknowledge the assistance of the Statistics unit at the Infectious Disease Institute.

## Competing interests

All authors have completed the ICMJE uniform disclosure form at [www.icmje.org/coi\\_disclosure.pdf](http://www.icmje.org/coi_disclosure.pdf) and declare: PN and JB had research grant support from EDCTP for the submitted work; KB and JB receive research grants from MRC UK and DFID; no financial relationships with any organisations that might have an interest in the submitted work in the previous three years; no other relationships or activities that could appear to have influenced the submitted work.

## Funding

This work was supported by the European & Developing Countries Clinical Trials Partnership (EDCTP) through project MF.2013.40205.020; however, EDCTP cannot accept any responsibility for information or views expressed herein. JB and KB receive support from the MRC UK and DFID (MRC grant number G0700837).

## Author contribution

PN, ANK, JB and KB conceived and designed the study. PN, ANK and AK conducted the study. PN analysed the data and developed the first draft. ANK, JB and KB advised on data analysis. All authors contributed to the interpretation of the data, revised the article critically and approved the final version.

1  
2  
3  
4  
5  
6  
7  
8  
9  
10  
11  
12  
13  
14  
15  
16  
17  
18  
19  
20  
21  
22  
23  
24  
25  
26  
27  
28  
29  
30  
31  
32  
33  
34  
35  
36  
37  
38  
39  
40  
41  
42  
43  
44  
45  
46  
47  
48  
49  
50  
51  
52  
53  
54  
55  
56  
57  
58  
59  
60

**Data sharing statement**

The original data can only be accessed by the research investigators at the Infectious Disease Institute. PN can be contacted if anonymised data or the statistical code are required

For peer review only

## REFERENCES

1. World Health Organization. Progress report 2016: prevent HIV, test and treat all: WHO support for country impact. Geneva, Switzerland; 2016.
2. Stover J, Bollinger L, Izazola JA, et al., What is required to end the AIDS epidemic as a public health threat by 2030? The cost and impact of the fast-track approach. *PLoS ONE* 2016;11(5):e0154893.
3. UNAIDS. 90-90-90 An ambitious treatment target to help end the AIDS epidemic. Geneva, Switzerland 2014. Available from <http://www.unaids.org/en/resources/documents/2017/90-90-90>.
4. Kisesa A, Chamla D. Getting to 90–90–90 targets for children and adolescents HIV in low and concentrated epidemics: bottlenecks, opportunities, and solutions. *Curr Opin HIV AIDS* 2016;11(Suppl1):S1.
5. Kranzer K, Govindasamy D, Ford N, et al. Quantifying and addressing losses along the continuum of care for people living with HIV infection in sub-Saharan Africa: a systematic review. *J Int AIDS Soc* 2012;15(2):17383
6. World Health Organization. Consolidated guidelines on the use of antiretroviral drugs for treating and preventing HIV infection. Recommendations for a public health approach. Second edition. Geneva, Switzerland; 2016.
7. Uganda AIDS Commission. Presidential Fast Track Initiative on Ending HIV and AIDS in Uganda. June 2017. <http://www.aidsuganda.org/images/documents/PresidentialHandbook.pdf>
8. Fox M, Rosen A. new cascade of HIV care for the era of 'treat all'. *PLoS Medicine* 2017;14(4):e1002268.
9. Geng EH, Glidden DV, Bwana MB, et al. Retention in care and connection to care among HIV-infected patients on antiretroviral therapy in Africa: estimation via a sampling-based approach. *PLoS ONE* 2011;6(7):e21797.
10. Tweya H, Feldacker C, Estill J, et al. Are they really lost? 'True' status and reasons for treatment discontinuation among HIV infected patients on antiretroviral therapy considered lost to follow up in urban Malawi. *PLoS ONE* 2013;8(9):e75761.
11. Geng EH, Bwana MB, Muyindike W, et al. Failure to initiate antiretroviral therapy, loss to follow-up and mortality among HIV-infected patients during

- 1  
2  
3 the pre-ART period in Uganda. *J Acquir Immune Defic Syndr* 2013;63(2):e64-  
4 71.  
5  
6 12. Geng EH, Glidden DV, Emenyonu N, et al. Tracking a sample of patients lost  
7 to follow-up has a major impact on understanding determinants of survival in  
8 HIV-infected patients on antiretroviral therapy in Africa. *Trop Med Int Health*,  
9 2010;15(Suppl1):63-69.  
10  
11 13. Geng EH, Emenyonu N, Bwana MB, et al. Sampling-based approach to  
12 determining outcomes of patients lost to follow-up in antiretroviral therapy  
13 scale-up programs in Africa. *JAMA* 2008;300(5):506-507.  
14  
15 14. Geng EH, Odeny TA, Lyamuya R, et al. Retention in care and patient-  
16 reported reasons for undocumented transfer or stopping care among HIV-  
17 infected patients on antiretroviral therapy in Eastern Africa: application of a  
18 sampling-based approach. *Clin Infect Dis* 2015:civ1004.  
19  
20 15. Infectious Disease Institute College of Health Sciences Makerere University  
21 Annual Report; 2015. [https://www.idi-makerere.com/index.php?option=  
22 com\\_docman&view=docman&Itemid=565](https://www.idi-makerere.com/index.php?option=com_docman&view=docman&Itemid=565).  
23  
24 16. Kiragga AN, Castelnovo B, Musomba R, et al. Comparison of methods for  
25 correction of mortality estimates for loss to follow-up after ART initiation: a  
26 case of the Infectious Diseases Institute, Uganda. *PLoS ONE*  
27 2013;8(12):e83524.  
28  
29 17. Egger M, Spycher BD, Sidle J, et al. Correcting mortality for loss to follow-up:  
30 a nomogram applied to antiretroviral treatment programmes in sub-Saharan  
31 Africa. *PLoS Med*, 2011;8(1):e1000390.  
32  
33 18. Namusoby J, Semitala FC, Amanyire G, et al. High retention in care among  
34 HIV-infected patients entering care with CD4 levels >350 cells/uL under  
35 routine program conditions in Uganda. *Clin Infect Dis* 2013;57(9):1343-1350.  
36  
37 19. Plazy M, Orne-Gliemann J, Dabis F, et al. Retention in care prior to  
38 antiretroviral treatment eligibility in sub-Saharan Africa: a systematic review of  
39 the literature. *BMJ Open* 2015;5(6):e006927.  
40  
41 20. Rosen S, Fox MP. Retention in HIV care between testing and treatment in  
42 sub-Saharan Africa: a systematic review. *PLoS Med* 2011;8(7):e1001056.  
43  
44 21. Govindasamy D, Ford N, Kranzer K. Risk factors, barriers and facilitators for  
45 linkage to antiretroviral therapy care: a systematic review. *AIDS*  
46 2012;26(16):2059-2067.  
47  
48  
49  
50  
51  
52  
53  
54  
55  
56  
57  
58  
59  
60

- 1  
2  
3 22. Schomaker M, Gsponer T, Estill J, et al. Non-ignorable loss to follow-up:  
4 correcting mortality estimates based on additional outcome ascertainment.  
5 *Stat Med* 2014;33(1):129-142.  
6  
7  
8  
9  
10  
11  
12  
13  
14  
15  
16  
17  
18  
19  
20  
21  
22  
23  
24  
25  
26  
27  
28  
29  
30  
31  
32  
33  
34  
35  
36  
37  
38  
39  
40  
41  
42  
43  
44  
45  
46  
47  
48  
49  
50  
51  
52  
53  
54  
55  
56  
57  
58  
59  
60



1  
2  
3  
4  
5  
6  
7  
8  
9  
10  
11  
12  
13  
14  
15  
16  
17  
18  
19  
20  
21  
22  
23  
24  
25  
26  
27  
28  
29  
30  
31  
32  
33  
34  
35  
36  
37  
38  
39  
40  
41  
42  
43  
44  
45  
46  
47  
48  
49  
50  
51  
52  
53  
54  
55  
56  
57  
58  
59  
60

**Figure 1: Uncorrected and corrected cumulative incidence of loss from care among patients with CD4 >500 registered for HIV care at 6 clinics**

For peer review only



Figure 1: Uncorrected and corrected cumulative incidence of loss from care among patients with CD4 >500 registered for HIV care at 6 clinics

78x57mm (300 x 300 DPI)

**STROBE 2007 (v4) checklist of items to be included in reports of observational studies in epidemiology\***  
**Checklist for cohort, case-control, and cross-sectional studies (combined)**

| Section/Topic             | Item # | Recommendation                                                                                                                                                                                                                                                                                                                                                                                                                                                         | Reported on page # |
|---------------------------|--------|------------------------------------------------------------------------------------------------------------------------------------------------------------------------------------------------------------------------------------------------------------------------------------------------------------------------------------------------------------------------------------------------------------------------------------------------------------------------|--------------------|
| Title and abstract        | 1      | (a) Indicate the study’s design with a commonly used term in the title or the abstract                                                                                                                                                                                                                                                                                                                                                                                 | 1                  |
|                           |        | (b) Provide in the abstract an informative and balanced summary of what was done and what was found                                                                                                                                                                                                                                                                                                                                                                    | 2                  |
| <b>Introduction</b>       |        |                                                                                                                                                                                                                                                                                                                                                                                                                                                                        |                    |
| Background/rationale      | 2      | Explain the scientific background and rationale for the investigation being reported                                                                                                                                                                                                                                                                                                                                                                                   | 4                  |
| Objectives                | 3      | State specific objectives, including any pre-specified hypotheses                                                                                                                                                                                                                                                                                                                                                                                                      | 5                  |
| <b>Methods</b>            |        |                                                                                                                                                                                                                                                                                                                                                                                                                                                                        |                    |
| Study design              | 4      | Present key elements of study design early in the paper                                                                                                                                                                                                                                                                                                                                                                                                                | 5, 6               |
| Setting                   | 5      | Describe the setting, locations, and relevant dates, including periods of recruitment, exposure, follow-up, and data collection                                                                                                                                                                                                                                                                                                                                        | 5, 6               |
| Participants              | 6      | (a) <i>Cohort study</i> —Give the eligibility criteria, and the sources and methods of selection of participants. Describe methods of follow-up<br><i>Case-control study</i> —Give the eligibility criteria, and the sources and methods of case ascertainment and control selection. Give the rationale for the choice of cases and controls<br><i>Cross-sectional study</i> —Give the eligibility criteria, and the sources and methods of selection of participants | 6,7                |
|                           |        | (b) <i>Cohort study</i> —For matched studies, give matching criteria and number of exposed and unexposed<br><i>Case-control study</i> —For matched studies, give matching criteria and the number of controls per case                                                                                                                                                                                                                                                 |                    |
| Variables                 | 7      | Clearly define all outcomes, exposures, predictors, potential confounders, and effect modifiers. Give diagnostic criteria, if applicable                                                                                                                                                                                                                                                                                                                               | 6-8                |
| Data sources/ measurement | 8*     | For each variable of interest, give sources of data and details of methods of assessment (measurement). Describe comparability of assessment methods if there is more than one group                                                                                                                                                                                                                                                                                   | 6, 7               |
| Bias                      | 9      | Describe any efforts to address potential sources of bias                                                                                                                                                                                                                                                                                                                                                                                                              | 7-8                |
| Study size                | 10     | Explain how the study size was arrived at                                                                                                                                                                                                                                                                                                                                                                                                                              | 6                  |
| Quantitative variables    | 11     | Explain how quantitative variables were handled in the analyses. If applicable, describe which groupings were chosen and why                                                                                                                                                                                                                                                                                                                                           | 7-8                |
| Statistical methods       | 12     | (a) Describe all statistical methods, including those used to control for confounding                                                                                                                                                                                                                                                                                                                                                                                  | 7-8                |
|                           |        | (b) Describe any methods used to examine subgroups and interactions                                                                                                                                                                                                                                                                                                                                                                                                    | 7-8                |
|                           |        | (c) Explain how missing data were addressed                                                                                                                                                                                                                                                                                                                                                                                                                            | 8                  |
|                           |        | (d) <i>Cohort study</i> —If applicable, explain how loss to follow-up was addressed<br><i>Case-control study</i> —If applicable, explain how matching of cases and controls was addressed                                                                                                                                                                                                                                                                              | 8                  |

|                          |     |                                                                                                                                                                                                              |           |
|--------------------------|-----|--------------------------------------------------------------------------------------------------------------------------------------------------------------------------------------------------------------|-----------|
|                          |     | <i>Cross-sectional study</i> —If applicable, describe analytical methods taking account of sampling strategy <sup>8</sup>                                                                                    |           |
|                          |     | (e) Describe any sensitivity analyses                                                                                                                                                                        | 8         |
| <b>Results</b>           |     |                                                                                                                                                                                                              |           |
| Participants             | 13* | (a) Report numbers of individuals at each stage of study—eg numbers potentially eligible, examined for eligibility, confirmed eligible, included in the study, completing follow-up, and analysed            | 8-9       |
|                          |     | (b) Give reasons for non-participation at each stage                                                                                                                                                         | 9         |
|                          |     | (c) Consider use of a flow diagram                                                                                                                                                                           | N/A       |
| Descriptive data         | 14* | (a) Give characteristics of study participants (eg demographic, clinical, social) and information on exposures and potential confounders                                                                     | 9         |
|                          |     | (b) Indicate number of participants with missing data for each variable of interest                                                                                                                          | 10        |
|                          |     | (c) <i>Cohort study</i> —Summarise follow-up time (eg, average and total amount)                                                                                                                             |           |
| Outcome data             | 15* | <i>Cohort study</i> —Report numbers of outcome events or summary measures over time                                                                                                                          | 9, 11     |
|                          |     | <i>Case-control study</i> —Report numbers in each exposure category, or summary measures of exposure                                                                                                         |           |
|                          |     | <i>Cross-sectional study</i> —Report numbers of outcome events or summary measures                                                                                                                           |           |
| Main results             | 16  | (a) Give unadjusted estimates and, if applicable, confounder-adjusted estimates and their precision (eg, 95% confidence interval). Make clear which confounders were adjusted for and why they were included | 9, 11, 12 |
|                          |     | (b) Report category boundaries when continuous variables were categorized                                                                                                                                    | N/A       |
|                          |     | (c) If relevant, consider translating estimates of relative risk into absolute risk for a meaningful time period                                                                                             | N/A       |
| Other analyses           | 17  | Report other analyses done—eg analyses of subgroups and interactions, and sensitivity analyses                                                                                                               | 9, 11     |
| <b>Discussion</b>        |     |                                                                                                                                                                                                              |           |
| Key results              | 18  | Summarise key results with reference to study objectives                                                                                                                                                     | 13        |
| Limitations              | 19  | Discuss limitations of the study, taking into account sources of potential bias or imprecision. Discuss both direction and magnitude of any potential bias                                                   | 15        |
| Interpretation           | 20  | Give a cautious overall interpretation of results considering objectives, limitations, multiplicity of analyses, results from similar studies, and other relevant evidence                                   | 15,16     |
| Generalisability         | 21  | Discuss the generalisability (external validity) of the study results                                                                                                                                        | 15        |
| <b>Other information</b> |     |                                                                                                                                                                                                              |           |
| Funding                  | 22  | Give the source of funding and the role of the funders for the present study and, if applicable, for the original study on which the present article is based                                                | 17        |

\*Give information separately for cases and controls in case-control studies and, if applicable, for exposed and unexposed groups in cohort and cross-sectional studies.

**Note:** An Explanation and Elaboration article discusses each checklist item and gives methodological background and published examples of transparent reporting. The STROBE checklist is best used in conjunction with this article (freely available on the Web sites of PLoS Medicine at <http://www.plosmedicine.org/>, Annals of Internal Medicine at <http://www.annals.org/>, and Epidemiology at <http://www.epidem.com/>). Information on the STROBE Initiative is available at [www.strobe-statement.org](http://www.strobe-statement.org).
